# Supplementary material for: Reproducibility of tender point examination in chronic low back pain patients as measured by intrarater and inter-rater reliability and agreement: a validation study
Source: PubMed Central journal article supplement — BMJ Open. 2013 Feb 23;3(2):e002532. doi: 10.1136/bmjopen-2012-002532 (PMC3586147; doi:10.1136/bmjopen-2012-002532), 2013-02-23
Supplement: bmjopen-2012-002532.draft_revisions.pdf [file bmjopen-2012-002532.draft_revisions.pdf]

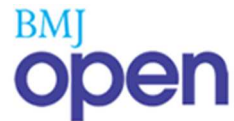

**Reproducibility of tender point examination in chronic low back pain patients as measured by intra- and interrater reliability and agreement: a validation study**

|                                 |                                                                                                                                                                                                                                                               |
|---------------------------------|---------------------------------------------------------------------------------------------------------------------------------------------------------------------------------------------------------------------------------------------------------------|
| Journal:                        | <i>BMJ Open</i>                                                                                                                                                                                                                                               |
| Manuscript ID:                  | bmjopen-2012-002532                                                                                                                                                                                                                                           |
| Article Type:                   | Research                                                                                                                                                                                                                                                      |
| Date Submitted by the Author:   | 23-Dec-2012                                                                                                                                                                                                                                                   |
| Complete List of Authors:       | Jensen, Ole; Regional Hospital Silkeborg, Spine Center<br>Callesen, Jacob; Aarhus University, Department of Public Health<br>Nielsen, Merete; Regional Hospital Silkeborg, Spine Center<br>Ellingsen, Torkell; Aarhus University, Department of Public Health |
| <b>Primary Subject Heading</b>: | Rheumatology                                                                                                                                                                                                                                                  |
| Secondary Subject Heading:      | Diagnostics                                                                                                                                                                                                                                                   |
| Keywords:                       | RHEUMATOLOGY, STATISTICS & RESEARCH METHODS, Pain management                                                                                                                                                                                                  |
|                                 |                                                                                                                                                                                                                                                               |

SCHOLARONE™  
Manuscripts

1  
2  
3  
4 **Reproducibility of tender point examination in chronic low back pain patients as**  
5 **measured by intra- and interrater reliability and agreement: a validation study**  
6  
7

8 Ole K. Jensen<sup>1,3</sup>

9 Jacob Callesen<sup>2</sup>

10 Merete G. Nielsen<sup>1,3</sup>

11 Torkell Ellingsen<sup>2,3</sup>

12  
13  
14  
15  
16  
17  
18  
19  
20 <sup>1,3</sup> Spine Center, Diagnostic Center, Regional Hospital Silkeborg, Denmark.

21 <sup>2</sup> Department of Public Health, Aarhus University, Denmark

22  
23 <sup>3</sup> Department of Rheumatology, Diagnostic Center, Region Hospital Silkeborg, Denmark  
24  
25  
26  
27  
28  
29  
30  
31  
32  
33  
34  
35  
36  
37  
38  
39  
40  
41  
42  
43  
44  
45

46 Address for correspondence: Ole Kudsk Jensen, Vestre Strandallé 158, 8240 Risskov

47 Tel: 004587227305, fax: 004587222750

48 E-mail: [olejesen@rm.dk](mailto:olejesen@rm.dk)  
49  
50  
51  
52

53 Keywords: Tender points, digital examination, low back pain, reliability, agreement  
54

55 Word count: 2,960  
56  
57  
58  
59  
60

## ABSTRACT

**Objectives:** To evaluate the reliability and agreement of digital tender point (TP) examination in chronic low back pain (LBP) patients.

**Design:** Cross-sectional study.

**Settings:** Hospital-based validation study.

**Participants:** Among sick-listed LBP patients referred from general practitioners for low back examination and return-to-work intervention, 43 and 39 patients (18 females, 46%) entered and completed the study, respectively.

**Main outcome measures:** The reliability was estimated by the intraclass correlation coefficient (ICC), and agreement was calculated for up to  $\pm 3$  TPs. Furthermore, the smallest detectable difference was calculated.

**Results:** TP examination was performed twice by two consultants in rheumatology and rehabilitation at 20 minutes intervals and repeated 1 week later. Intrarater reliability in the more and less experienced rater was ICC 0.84 (95% confidence interval (CI): 0.69–0.98) and 0.72 (CI: 0.49–0.95), respectively. The figures for interrater reliability were intermediate between these figures. In more than 70% of the cases the raters agreed within  $\pm 3$  TPs in both men and women and between test days. The smallest detectable difference between raters was 5, and for the more and less experienced rater it was 4 and 6 TPs, respectively.

**Conclusions:** The reliability of digital TP examination ranged from acceptable to excellent, and agreement was good in both men and women. The smallest detectable differences varied from 4 to 6 TPs. Thus, TP examination in our hands was a reliable, but not a precise instrument. Digital TP examination may be useful in daily clinical practice, but regular use and training sessions are required to secure quality of testing.

## ARTICLE SUMMARY

### Article Focus

- Diffuse hyperalgesia may be evaluated by tender point examination and may reflect deficient descending pain inhibition as in fibromyalgia.
- Tender point examination is increasingly relevant to improve clinical assessment in inflammatory as well as non-inflammatory rheumatologic disorders.
- Reproducibility of this examination technique is not well documented and was therefore investigated.

### Key messages

- In sick-listed chronic low back pain patients digital tender point examination was a reliable, but not a precise instrument.
- In both women and men there was more than 70% agreement within  $\pm 3$  tender points.
- The method was quick and easy to use with no requirement for equipment, except in initial training sessions.

### Strengths and limitations

- The study included a well defined chronic low back pain population that was referred from general practitioners for low back pain examination and return-to-work intervention.
- The number of patients was limited and only two raters were involved resulting in wide confidence intervals and limited generalisability.

## INTRODUCTION

Tender point (TP) examination has been the cornerstone examination in patients with chronic widespread pain (CWP) to distinguish fibromyalgia patients from patients with CWP only. In the general population, the former and the latter condition have been identified in 0.5–4%<sup>1</sup> and 10–13%,<sup>2,3</sup> respectively. Persons fulfilling the fibromyalgia criteria (CWP &  $\geq 11$  TPs) report more pain and more disability than persons with CWP who have less than 11 TPs.<sup>4</sup> TP examination is performed by standardised digital palpation at 18 points symmetrically distributed on the body (Figure 1).<sup>5</sup> In the general population, men and women have a median of 3 and 6 TPs, respectively,<sup>6</sup> and women may have up to 4 TPs more than men.<sup>7</sup>

TP examination may be relevant in conditions other than CWP or regional pain syndromes. In inflammatory rheumatic diseases, TP examination may also contribute to the clinical evaluation. For instance, high disease activity in the absence of inflammatory activity in rheumatoid arthritis is often seen in patients with many TPs.<sup>8</sup> This may lead to inappropriate treatment of disease activity. In systemic lupus erythematosus, health status has been shown to be inferior in patients with many TPs as compared to patients with few TPs.<sup>9</sup>

In sick-listed low back pain (LBP) patients, the intensity of back pain is associated with the number of TPs, and patients with radiculopathy have fewer TPs than patients with non-specific LBP.<sup>10</sup> Furthermore, TPs are associated with the reporting of widespread pain and with long-term prognosis.<sup>11</sup> According to another study,<sup>12</sup> patients with both CWP and non-specific LBP have more pain, higher disability and more TPs than patients with LBP only.

Reliability and agreement studies are, however, few and insufficient. The original study defining fibromyalgia<sup>5</sup> included 293 patients and 265 controls. Since then, we have been able to identify only three small studies comparing the reliability of digital palpation and dolorimetry with TPs defined as in the original study.<sup>13–15</sup> Each study included 15–25 individuals. The reliability was acceptable and comparable for both dolorimetry and digital palpation, and Kappa-values of 0.44–0.92 were reported for the digital examination. However, only the reliability of testing each TP location as positive was estimated, not the reliability of the total TP counts. In other non-specific pain studies, the reliability of TP examination was not formally tested, or digital examination was not used.<sup>16–20</sup>

Since the total TP count – and not each single TP – is used for the clinical evaluation in rheumatologic conditions, more reliability and agreement studies of the total TP count are needed.

1  
2  
3  
4 Accordingly, the purpose of the present study was to investigate the reproducibility of total TP  
5 counts based on digital TP examination in chronic sick-listed LBP patients in terms of 1) intra- and  
6 interrater reliability and 2) intra- and interrater agreement.  
7  
8

## 9 10 **METHODS**

11 The patients were recruited among patients referred from their general practitioners to the Spine  
12 Center for participation in a controlled study.  
13

14 Inclusion criteria: partly or fully sick-listed for more than 4 weeks due to LBP with or without  
15 radiculopathy, LBP should be the prime reason for sick-listing and at least as bothersome as pain  
16 elsewhere, age 16-60 years, referred from a well-defined geographical area of about 280,000  
17 inhabitants, and the patient should be able to speak and understand Danish.  
18

19 Exclusion criteria: living outside the referral area, continuing or progressive radiculopathy resulting  
20 in plans for surgery, low back surgery within the last year, previous lumbar fusion operation,  
21 suspected cauda equina syndrome, progressive paresis or other serious back disease, (e.g. tumour),  
22 pregnancy, known dependency on drugs or alcohol, or primary psychiatric disease.  
23

24 Except for the duration of sick-listing, which was longer than 4 weeks in some of the patients, all  
25 participants fulfilled the above criteria.  
26

27 The patients were contacted between 1<sup>st</sup> November 2009 and 1<sup>st</sup> March 2010 and were only  
28 included in the present study after more than 3 weeks had passed since their first consultation at the  
29 Spine Center. They were offered participation in the study by one of the authors (JC) who was the  
30 leader of the project but was not a staff member, and they were told that the investigation had  
31 nothing to do with the management of their LBP. The patients were informed that the examination  
32 would only include measuring of diffuse tenderness by TP examination and spinal range of motion  
33 (not reported in this paper). Previously, all patients had been subjected to a clinical low back  
34 examination and TP examination at their first consultation at the Spine Center.  
35

36 The examinations were performed by two clinicians (OKJ & MGN), both consultants in  
37 rheumatology and rehabilitation. Beforehand, the TP examination method was taught by the more  
38 experienced rater (OKJ = Rater A) to the less experienced rater (MGN = Rater B) during a 2-hour  
39 session. Each test day, before starting examinations, the two raters calibrated their thumbs with a  
40 dolorimeter,<sup>21</sup> which was able to register four pressures at a time and calculate means and standard  
41 deviations.  
42  
43  
44  
45  
46  
47  
48  
49  
50  
51  
52  
53  
54  
55  
56  
57  
58  
59  
60

1  
2  
3  
4 The examinations were performed during 2 test days, day 1 and day 2, at 1 week intervals. To  
5 include all patients, the test days were repeated twice. The patients were randomised so that half of  
6 the patients were first tested by Rater A, the other half first by Rater B, but keeping the same  
7 sequence on day 2 as on day 1. Twenty minutes passed between the examinations.  
8

9  
10 Before examination, the patients filled out a questionnaire including questions regarding back+leg  
11 pain<sup>22</sup> and disability,<sup>23</sup> increasing scores representing increasing pain and disability. At the clinical  
12 examination, the patient's range of spinal motion was first measured in the standing position.  
13

14 Subsequently, the patient was asked to lie prone, and a 4-kg digital pressure was demonstrated on  
15 the distal, dorsal aspect of the forearm. The patient was instructed in the following way: "This is a  
16 firm pressure. Afterwards, this pressure will be applied on different spots on the body. At every  
17 spot, I would like you to report if the pressure is painful or is felt like firm pressure." The TPs  
18 (figure 1) were tested in a standardised manner from right to left, first testing the medial fat pads of  
19 the knees and the posterior aspects of the greater trochanter. Afterwards, with the patient seated, the  
20 spots were tested from top and downwards as follows: the suboccipital muscle insertions, the  
21 anterior-lateral aspect of the intertransverse aspects of C5-7, the midpoints of the upper borders of  
22 trapezius, the medial parts of the supraspinatus, the costo-chondral junctions of costa 2, the forearm  
23 2 cm distal to the epicondyles, and the outer upper quadrants of the buttocks. The patients were  
24 instructed not to tell the result of the TP examination to the raters or others.  
25  
26

27  
28 Positive TPs (e.g. pressures causing pain) were memorised by the raters and summed up to the total  
29 number of TPs (the TP count). The procedure lasted 6-8 minutes per examination. A secretary was  
30 associated with each rater. The TP counts were reported to this secretary, who passed the data to the  
31 project leader (JC). In this way the raters were blinded in relation to each other.  
32  
33

### 34 35 36 37 38 39 40 41 42 **Statistical analyses**

43 The requirement for testing intra- and interrater reliability was planned to include a sample size of  
44 at least 40 persons.<sup>24</sup> The TP counts were distributed as discrete numerical variables and were  
45 normally distributed. For the quantification of intra- and interrater reproducibility of tender point  
46 examination, two types of analysis were applied: the intraclass correlation coefficient (ICC) and the  
47 Bland-Altman method for assessing agreement.<sup>25 26</sup> ICC provides information on the ability to  
48 differentiate between the variation between subjects and measurement variation. The ICC was  
49 defined as the ratio of variance among patients (subject variability) over the total variance (subject  
50 variability, observer variability and measurement variability). ICC ranges between 0 (no reliability)  
51  
52  
53  
54  
55  
56  
57  
58  
59  
60

1  
2  
3  
4 and 1 (perfect reliability), and values of ICCs are excellent when  $> 0.75$  and poor when  $< 0.40$ .  
5 Results between these ranges represent moderate to good reliability.<sup>27</sup> According to another  
6 reference, ICC  $> 0.7$  is considered good.<sup>25</sup>  
7  
8

9 The Bland-Altman method provides insight into the distribution of differences in relation to mean  
10 values.<sup>28</sup> Agreement was quantified by calculating the mean difference between two sets of  
11 observations and the standard deviation (SD) for this difference. The closer the mean difference was  
12 to 0 and the smaller the SD of this difference, the better the agreement. The differences were  
13 depicted in relation to the mean values. The 95% limits of agreement were defined as the mean  
14 difference between the raters  $\pm 1.96 \times \text{SD}_{\text{of the difference}}$ . Furthermore, agreement within  $\pm 1$  TPs and  
15  $\pm 3$  TPs was calculated.  
16  
17

18 To determine whether a real change in outcome has occurred in clinical practice and research, a  
19 change must be at least the smallest detectable difference (SDD) of a measurement procedure.<sup>25</sup> The  
20 SDD was calculated as  $1.96 \times \sqrt{(2) \times \text{SEM}^2}$ , where the standard error of measurement (SEM) was  
21 defined as  $\text{SD}_{\text{of the difference}}/\sqrt{2}$ . SDD was calculated and rounded up to the nearest whole number.  
22  
23  
24  
25  
26  
27  
28

## 29 RESULTS

30 Eighty-three patients were invited to join the study, and 39 patients completed both test days (figure  
31 2). Four patients dropped out from day 1 to day 2, three without explanation, the fourth was  
32 excluded because of hospital admission and change of pain medication between the two test days.  
33 Pain medication was unchanged in the other patients.  
34  
35

36 Baseline characteristics are displayed in table 1.  
37  
38  
39

### 40 *Intrarater reliability and agreement*

41 The mean TP count was 7 and differed little between test days (table 2). The intraclass correlation  
42 coefficient (ICC) in Rater A was excellent, 0.83 (95% confidence interval (CI) 0.69-0.98),  
43 reflecting a high degree of reliability. ICC was somewhat lower, but still good in Rater B, 0.72 (CI  
44 0.49-0.95). The relations between TP counts on days 1 and 2 are graphically displayed in figure 3  
45 (left panel). The circles representing more than one observation were all located near the equality  
46 lines, and the observations were distributed over the whole range of TP counts.  
47  
48  
49

50 In about half of the observations, agreement was within  $\pm 1$  TP. For both raters more than 75% of  
51 the TP counts were within  $\pm 3$  TPs in both sexes. The limits of agreement were within  $\pm 4$  and  $\pm$   
52 6 TPs for Rater A and B, respectively (figure 3 right panel), corresponding to the smallest  
53  
54  
55  
56  
57  
58  
59  
60



1  
2  
3  
4 detectable differences (SDD) (table 2). Measurement errors (SEM) were 1.34 ( $=1.90/\sqrt{2}$ ) and 1.89  
5  
6 ( $=2.68/\sqrt{2}$ ) for Rater A and Rater B, respectively.  
7

### 8 9 *Interrater reliability and agreement*

10 The mean differences of TP counts differed little between the two raters (Table 3). The relations  
11 between TP counts of Rater A and Rater B are shown in figure 4, left panel, and limits of agreement  
12 in the right panel. The circles representing more than one observation were all located near the  
13 equality and zero lines. On both test days ICC was higher than 0.75. In more than 70% of the cases,  
14 Rater B agreed with Rater A regarding +/-3 TPs in both men and women. The limits of agreement  
15 were within +/-5 TPs corresponding to SDD of 5 TPs. Measurement errors (SEM) were 1.63  
16 ( $=2.30/\sqrt{2}$ ) and 1.47 ( $=2.08/\sqrt{2}$ ) on day 1 and day 2, respectively.  
17  
18  
19  
20  
21  
22  
23  
24  
25

## 26 **DISCUSSION**

27 The present study showed that digital TP examination resulted in total TP counts with acceptable to  
28 excellent reliability when calibration of the thumbs with a dolorimeter was performed before the  
29 testing. This indicated that the measurement error, which was less than 2 TPs, was considerably  
30 smaller than the variation between individuals. The lesser experienced Rater B did not perform as  
31 well as the more experienced Rater A, and this was especially evident on comparison of the lower  
32 limits of the confidence intervals. However, the reliability of Rater B was acceptable, but more  
33 training and regular use would probably improve the results. Training has been shown to reduce the  
34 variability in applying a 4-kg digital force.<sup>29</sup>

35 Agreement is independent of the variation between subjects. We consider an agreement of more  
36 than 70% as good, and it was found for +/-3 TPs in both men and women, indicating that digital TP  
37 examination in daily practice may be used, keeping in mind the uncertainty of +/-3 TPs. This part of  
38 the result was especially important, since we found that TP counts were higher in women than in  
39 men, in line with other studies. In the general population, TP counts of more than 10 and 6 have  
40 been identified in 10-20% of women and men, respectively.<sup>6,7</sup> Thus, a TP count of 9 may be normal  
41 in women, but high in men.  
42

43 The median TP count of 8 was elevated as compared to the median TP count in the general  
44 population which is between 3 and 6 TPs.<sup>6</sup> Previously, it has been shown that TP counts were  
45  
46  
47  
48  
49  
50  
51  
52  
53  
54  
55  
56  
57  
58  
59  
60

1  
2  
3  
4 elevated in regional pain conditions as compared to pain-free controls, but lower than in  
5 fibromyalgia.<sup>30</sup>  
6

7 However, SDD ranged from 4 to 6, indicating less precision of TP examination than reliability.  
8

9 Thus, according to the present study, TP examination may result in TP counts that may differentiate  
10 between high, intermediate or low levels, but not between different levels in the low or high range.  
11

12 Moreover, TP examination – as used in the present study – would not be sufficiently precise to  
13 differentiate patients with higher or lower TP counts than 10/11 TPs such as are used in the  
14 diagnosis of fibromyalgia.  
15

16 Accordingly, a SDD of 4-6 was not impressive, but not so different from other measures in LBP.  
17

18 The minimal detectable change, which is defined closely to SDD,<sup>25 31</sup> has been shown to be 4-5  
19 points in the Roland Morris Questionnaire,<sup>32</sup> a commonly used instrument in LBP.  
20

21 In fibromyalgia, the peripheral sensory thresholds are normal, but pain processing is augmented,  
22 primarily due to dysfunction of the descending pain inhibition system in the brainstem.<sup>33</sup> In the  
23 present study, the patients were sick-listed because of chronic LBP, and we have previously  
24 presented data making it plausible that LBP can partly be explained by mechanisms similar to  
25 those seen in fibromyalgia patients.<sup>10</sup>  
26

27 In chronic LBP patients, TPs may be interpreted as follows: A high TP count may indicate an  
28 insufficiently functioning descending pain inhibition system, whereas a low TP count may indicate  
29 a well-functioning system. TP counts in the middle of the distribution are inconclusive. The present  
30 study does not provide sufficient data to set limits for high or low TP counts in LBP patients.  
31

32 In the present chronic LBP population, there was no significant change in TP counts during 1 week.  
33 We could have chosen a shorter or longer interval, but 1 week was chosen for pragmatic reasons,  
34 because we assumed that 1 week would not be too long in a patient population with long-lasting  
35 pain. One might expect more change in TP counts during 1 week in patients with acute LBP. A  
36 systematic difference in TP count between the first and second TP examination might have  
37 occurred, but such a potential difference was not apparent because the raters were randomised to be  
38 either the first or second rater.  
39  
40  
41  
42  
43  
44  
45  
46  
47  
48

49 The value of TP examination has been questioned. Firstly, the examination method may be  
50 unreliable, because the pain response may be affected by expectations<sup>1</sup> or distress.<sup>34</sup> When the  
51 examination is performed randomly with the patient blinded for the pressure gradient, the results are  
52 different as compared to non-blinded testing.<sup>34 35</sup> Secondly, it may be inadequate to use a sharp cut-  
53  
54  
55  
56  
57  
58  
59  
60

1  
2  
3  
4 point ( $\geq 11$  TPs) to distinguish health from disease in pain conditions.<sup>36</sup> At present, fibromyalgia is  
5 considered part of a larger continuum.<sup>37 38</sup> Thirdly, there have been problems with implementation  
6 of the examination technique, especially in primary care. Often, it has been incorrectly performed,  
7 and some physicians have refused to use the method.<sup>39</sup>  
8

9  
10 Therefore, new criteria for diagnosing fibromyalgia have been developed and validated. These  
11 criteria do not include TP examination, and therefore they will enable clinicians and researchers to  
12 diagnose fibromyalgia by surveys. However, the new criteria were not meant to replace the original  
13 ACR criteria, but to represent an alternative method of diagnosis;<sup>39</sup> and the new criteria have not  
14 been tested in rheumatic conditions and may not be relevant in patients with inflammatory  
15 rheumatic diseases. In these conditions, fibromyalgia symptoms may be caused by the rheumatic  
16 disease and not by dysfunction of the descending pain inhibition system. Therefore, TP examination  
17 will still be relevant both at present and in the future.  
18  
19  
20  
21  
22  
23

#### 24 25 26 *Strengths*

27 The present study was conducted in a well-defined population recruited by general practitioners on  
28 the basis of sick-listing due to LBP, and all had chronic LBP. TPs were normally distributed,  
29 making it possible to analyze data with parametric methods.  
30  
31  
32

#### 33 34 *Weaknesses*

35 The number of patients was small, resulting in wide confidence intervals of ICC, and only two  
36 raters participated. If more raters had participated, the results would be more generalisable.  
37  
38  
39

#### 40 41 *Perspectives*

42 The possible advantages of using TP examination in LBP patients include ease and speed, no  
43 requirement for equipment, and good reliability and agreement. Furthermore, malingering or  
44 appealing distress will probably not induce bias in LBP patients, who do not know what to prefer,  
45 many or few tender points.  
46  
47

48 The possible disadvantages include lack of precision and the need for training and equipment  
49 (dolorimeter).  
50

51 We need to know more about the variability of the TP count over time, and we need reproducibility  
52 studies comparing TP counts with other measures of dysfunction of the descending pain inhibiting  
53  
54  
55  
56  
57  
58  
59  
60

1  
2  
3  
4 system.<sup>37</sup> As an example, lack of cold tolerance has been documented in whiplash patients with  
5 prolonged symptoms.<sup>40</sup> TP counts may be compared with cold tolerance.  
6

7 Furthermore, it would be interesting to see reliability and agreement studies of the total TP count in  
8 fibromyalgia patients and patients with inflammatory rheumatic diseases. Findings resembling the  
9 results of the present study may have implications for the fibromyalgia criteria.  
10  
11

### 12 13 14 *Conclusion*

15 Digital TP examination in sick-listed chronic LBP patients was a reliable, but not a precise  
16 instrument. More reliability and agreement studies are needed in LBP patients and other  
17 populations, including patients with inflammatory rheumatic diseases.  
18  
19  
20  
21  
22  
23  
24  
25  
26  
27  
28  
29  
30  
31  
32  
33  
34  
35  
36  
37  
38  
39  
40  
41  
42  
43  
44  
45  
46  
47  
48  
49  
50  
51  
52  
53  
54  
55  
56  
57  
58  
59  
60

### Acknowledgements

The authors thank Senior Biostatistician Robin Christensen, MSc, PhD, Head of Musculoskeletal Statistics Unit, The Parker Institute, Copenhagen University Hospital, Denmark, for invaluable help with the statistical analyses.

### Funding

The study was supported by The Research Fund of Regional Hospital Silkeborg, Denmark.

### Competing interests

None

### Ethics approval

All patients signed informed consent. The study was reported to the Regional Ethics Committee, who answered that approval was not necessary because only methodology was studied. The study was reported to the Danish Data Protection Agency (No. 2007-58-0010).

### Author contributions

Jacob Callesen (JC), Ole K. Jensen (OKJ) and Torkell Ellingsen (TE) planned the study. JC designed the study in detail and was responsible for acquisition of data and obtaining funding. Merete G. Nielsen (MGN) and OKJ performed the clinical examinations. JC and OKJ were responsible for analysing and interpreting the data. OKJ wrote the manuscript, which was again revised by JC, TE and MGN. OKJ was responsible for administrative and technical support. All authors discussed the results and commented on the manuscript.

### Data Sharing

The data have been published in Danish in a thesis entitled

Jacob Callesen: Intra- og intertester variabilitet af tenderpoint undersøgelse hos lænderygpatienter. Århus universitet 2010.

## REFERENCES

1. Clauw DJ, Crofford LJ. Chronic widespread pain and fibromyalgia: what we know, and what we need to know. *Best.Pract.Res.Clin.Rheumatol* 2003;17:685-701.
2. Macfarlane GJ, Pye SR, Finn JD, *et al.* Investigating the determinants of international differences in the prevalence of chronic widespread pain: evidence from the European Male Ageing Study. *Ann.Rheum.Dis* 2009;68:690-5.
3. Bergman S, Herrstrom P, Hogstrom K, *et al.* Chronic musculoskeletal pain, prevalence rates, and sociodemographic associations in a Swedish population study. *J.Rheumatol.* 2001;28:1369-77.
4. Coster L, Kendall S, Gerdle B, *et al.* Chronic widespread musculoskeletal pain - a comparison of those who meet criteria for fibromyalgia and those who do not. *Eur.J Pain* 2008;12:600-10.
5. Wolfe F, Smythe HA, Yunus MB, *et al.* The American College of Rheumatology 1990 Criteria for the Classification of Fibromyalgia. Report of the Multicenter Criteria Committee. *Arthritis Rheum.* 1990;33:160-72.
6. Croft P, Schollum J, Silman A. Population study of tender point counts and pain as evidence of fibromyalgia. *BMJ* 1994;309:696-9.
7. Wolfe F, Ross K, Anderson J, *et al.* Aspects of fibromyalgia in the general population: sex, pain threshold, and fibromyalgia symptoms. *J Rheumatol* 1995;22:151-6.
8. Ton E, Bakker MF, Verstappen SM, *et al.* Look beyond the disease activity score of 28 joints (DAS28): tender points influence the DAS28 in patients with rheumatoid arthritis. *J Rheumatol.* 2012;39:22-7.
9. Akkasilpa S, Goldman D, Magder LS, *et al.* Number of fibromyalgia tender points is associated with health status in patients with systemic lupus erythematosus. *J Rheumatol.* 2005;32:48-50.
10. Jensen OK, Nielsen CV, Stengaard-Pedersen K. Low back pain may be caused by disturbed pain regulation: a cross-sectional study in low back pain patients using tender point examination. *Eur.J Pain* 2010;14:514-22.
11. Jensen OK, Nielsen CV, Stengaard-Pedersen K. One-year prognosis in sick-listed low back pain patients with and without radiculopathy. Prognostic factors influencing pain and disability. *Spine J* 2010;10:659-75.
12. Nordeman L, Gunnarsson R, Mannerkorpi K. Prevalence and characteristics of widespread pain in female primary health care patients with chronic low back pain. *Clin J Pain.* 2012;28:65-72.
13. Cott A, Parkinson W, Bell MJ, *et al.* Interrater reliability of the tender point criterion for fibromyalgia. *J Rheumatol.* 1992;19:1955-9.
14. Tunks E, McCain GA, Hart LE, *et al.* The reliability of examination for tenderness in patients with myofascial pain, chronic fibromyalgia and controls. *J Rheumatol.* 1995;22:944-52.

15. Rasmussen JO, Smidth M, Hansen TM. [Examination of tender points in soft tissue. Palpation versus pressure-algometer]. *Ugeskr.Laeger* 1990;152:1522-6.
16. Maquet D, Croisier JL, Demoulin C, *et al.* Pressure pain thresholds of tender point sites in patients with fibromyalgia and in healthy controls. *Eur.J Pain* 2004;8:111-7.
17. McVeigh JG, Finch MB, Hurley DA, *et al.* Tender point count and total myalgic score in fibromyalgia: changes over a 28-day period. *Rheumatol.Int* 2007;27:1011-8.
18. Tastekin N, Uzunca K, Sut N, *et al.* Discriminative value of tender points in fibromyalgia syndrome. *Pain Med* 2010;11:466-71.
19. Tastekin N, Birtane M, Uzunca K. Which of the three different tender points assessment methods is more useful for predicting the severity of fibromyalgia syndrome? *Rheumatol.Int* 2007;27:447-51.
20. Harden RN, Revivo G, Song S, *et al.* A critical analysis of the tender points in fibromyalgia. *Pain Med* 2007;8:147-56.
21. Commander Algometry. 2004. JTECH Medical, 470 Lawndale Drive, Salt Lake City, 84115 Utah,
22. Manniche C, Asmussen K, Lauritsen B, *et al.* Low Back Pain Rating scale: validation of a tool for assessment of low back pain. *Pain* 1994;57:317-26.
23. Albert HB, Jensen AM, Dahl D, Rasmussen MN. [Criteria validation of the Roland Morris questionnaire. A Danish translation of the international scale for the assessment of functional level in patients with low back pain and sciatica]. *Ugeskr.Laeger* 2003;165:1875-80.
24. Hopkins WG. Measures of reliability in sports medicine and science. *Sports Med* 2000;30:1-15.
25. de Vet HC, Terwee CB, Knol DL, *et al.* When to use agreement versus reliability measures. *J Clin Epidemiol.* 2006;59:1033-9.
26. Kottner J, Audige L, Brorson S, *et al.* Guidelines for Reporting Reliability and Agreement Studies (GRRAS) were proposed. *Int J Nurs.Stud.* 2011;48:661-71.
27. Andresen EM. Criteria for assessing the tools of disability outcomes research. *Arch Phys Med Rehabil.* 2000;81:S15-S20.
28. Bland JM, Altman DG. Statistical methods for assessing agreement between two methods of clinical measurement. *Lancet* 1986;1:307-10.
29. Smythe H. Examination for tenderness: learning to use 4 kg force. *J Rheumatol.* 1998;25:149-51.
30. Granges G, Littlejohn G. Pressure pain threshold in pain-free subjects, in patients with chronic regional pain syndromes, and in patients with fibromyalgia syndrome. *Arthritis Rheum.* 1993;36:642-6.
31. Stauffer ME, Taylor SD, Watson DJ, *et al.* Definition of nonresponse to analgesic treatment of arthritic pain: an analytical literature review of the smallest detectable difference, the minimal detectable change, and the minimal clinically important difference on the pain visual analog scale. *Int J Inflamm.* 2011; 2011: Article ID 231926, 6 pages. doi:10.4061/2011/231926.
32. Stratford PW, Binkley J, Solomon P, *et al.* Defining the minimum level of detectable change for the Roland-Morris questionnaire. *Phys Ther.* 1996;76:359-65.

- 1  
2  
3  
4 33. Nielsen LA, Henriksson KG. Pathophysiological mechanisms in chronic musculoskeletal pain  
5 (fibromyalgia): the role of central and peripheral sensitization and pain disinhibition.  
6 *Best.Pract.Res.Clin.Rheumatol* 2007;21:465-80.  
7  
8 34. Petzke F, Gracely RH, Park KM, *et al.* What do tender points measure? Influence of distress on 4  
9 measures of tenderness. *J Rheumatol.* 2003;30:567-74.  
10  
11 35. Harris RE, Gracely RH, McLean SA, *et al.* Comparison of clinical and evoked pain measures in  
12 fibromyalgia. *J Pain* 2006;7:521-7.  
13  
14 36. Wolfe F. The relation between tender points and fibromyalgia symptom variables: evidence that  
15 fibromyalgia is not a discrete disorder in the clinic. *Ann.Rheum.Dis* 1997;56:268-71.  
16  
17 37. Arendt-Nielsen L, Graven-Nielsen T. Central sensitization in fibromyalgia and other musculoskeletal  
18 disorders. *Curr.Pain Headache Rep.* 2003;7:355-61.  
19  
20 38. Perrot S, Dickenson AH, Bennett RM. Fibromyalgia: harmonizing science with clinical practice  
21 considerations. *Pain Pract* 2008;8:177-89.  
22  
23 39. Wolfe F, Clauw DJ, Fitzcharles MA, *et al.* The American College of Rheumatology preliminary  
24 diagnostic criteria for fibromyalgia and measurement of symptom severity. *Arthritis Care Res*  
25 *(Hoboken.)* 2010;62:600-10.  
26  
27 40. Kasch H, Qerama E, Bach FW, Jensen TS. Reduced cold pressor pain tolerance in non-recovered  
28 whiplash patients: a 1-year prospective study. *Eur J Pain.* 2005;9:561-9.  
29  
30  
31  
32  
33  
34  
35  
36  
37  
38  
39  
40  
41  
42  
43  
44  
45  
46  
47  
48  
49  
50  
51  
52  
53  
54  
55  
56  
57  
58  
59  
60



## LEGENDS FOR FIGURES

**Figure 1** Locations of tender points according to American College of Rheumatology<sup>5</sup>.

**Figure 2** Flow-chart.

**Figure 3** Intrarater reliability and agreement. Reliability with lines of equality shown in left panel. Agreement shown by Bland-Altman plots in right panel displaying differences of tender point (TP) counts on y-axes and average of TP counts on x-axes. The upper and the lower horizontal line represent 95% limits of agreement. Areas of the circles are proportional to the number of observations.

**Figure 4** Interrater reliability and agreement. Reliability with lines of equality shown in left panel. Agreement shown by Bland-Altman plots in right panel displaying differences of tender point (TP) counts on y-axes and the average of TP counts on x-axes. The upper and the lower horizontal line represent 95% limits of agreement. Areas of the circles are proportional to the number of observations.

**Table 1** Baseline characteristics

| <b>Variables</b>                     |              |
|--------------------------------------|--------------|
| Sex (men/women)                      | 21/18        |
| Age (mean, range)                    | 42.0 (24–58) |
| Back+leg pain (0–60, median, range ) | 22 (2–50)    |
| Disability (0–23, median, range)     | 14 (0–23)    |
| Tender points* (0–18, median, range) | 8 (0–18)     |
| Duration of pain (n, %)              |              |
| 3–6 months                           | 13 (33)      |
| 7–12                                 | 12 (31)      |
| >12                                  | 14 (36)      |

Back+leg pain measured as the sum of worst, average and actual pain. Disability estimated by the Roland Morris Questionnaire, and tender points estimated by standardised digital palpation.

\* Median tender points of Observer A on day 1: men 5, women 10.5.

**Table 2** Intrarater differences, reliability and agreement

|                   | Day 1<br>mean<br>(SD) | Day 2<br>mean<br>(SD) | Intra-<br>observer<br>difference<br>mean<br>(SD) | Intraclass<br>correlation<br>coefficient<br>(CI) | Agreement (%)                   |                                 | Limits of<br>agreement | SDD* |
|-------------------|-----------------------|-----------------------|--------------------------------------------------|--------------------------------------------------|---------------------------------|---------------------------------|------------------------|------|
|                   |                       |                       |                                                  |                                                  | +/- 1 TP<br>all<br>men<br>women | +/- 3 TP<br>all<br>men<br>women |                        |      |
| <b>Observer A</b> | 7.23<br>(4.61)        | 7.08<br>(4.95)        | -0.15<br>(1.90)                                  | 0.83<br>(0.69–0.98)                              | 62<br>62<br>61                  | 95<br>90<br>100                 | -3.65; 3.95            | 4    |
| <b>Observer B</b> | 7.10<br>(4.73)        | 7.41<br>(5.78)        | 0.31<br>(2.68)                                   | 0.72<br>(0.49–0.95)                              | 49<br>62<br>33                  | 85<br>90<br>78                  | -5.05; 5.66            | 6    |

Reliability estimated by the intraclass correlation coefficient.

\* Smallest detectable difference

SD, standard deviation; CI, 95% confidence interval; TP, tender points.

**Table 3** Interrater differences, reliability and agreement

|              | Observer<br>A<br>mean<br>(SD) | Observer<br>B<br>mean<br>(SD) | Inter-<br>observer<br>difference<br>mean<br>(SD) | Intraclass<br>correlation<br>coefficient<br>(CI) | Agreement (%)                   |                                 | Limits of<br>agreement | SDD |
|--------------|-------------------------------|-------------------------------|--------------------------------------------------|--------------------------------------------------|---------------------------------|---------------------------------|------------------------|-----|
|              |                               |                               |                                                  |                                                  | +/- 1 TP<br>all<br>men<br>women | +/- 3 TP<br>all<br>men<br>women |                        |     |
| <b>Day 1</b> | 7.23<br>(4.61)                | 7.10<br>(4.73)                | -0.13<br>(2.30)                                  | 0.77<br>(0.58–0.97)                              | 59<br>67<br>50                  | 85<br>95<br>72                  | -4.64; 4.72            | 5   |
| <b>Day 2</b> | 7.08<br>(4.95)                | 7.41<br>(5.78)                | 0.33<br>(2.08)                                   | 0.84<br>(0.70–0.99)                              | 56<br>57<br>56                  | 87<br>90<br>83                  | -3.83; 4.50            | 5   |

Reliability estimated by the intraclass correlation coefficient.

\*Smallest detectable difference

SD, standard deviation; CI, 95% confidence interval; TP, tender points.

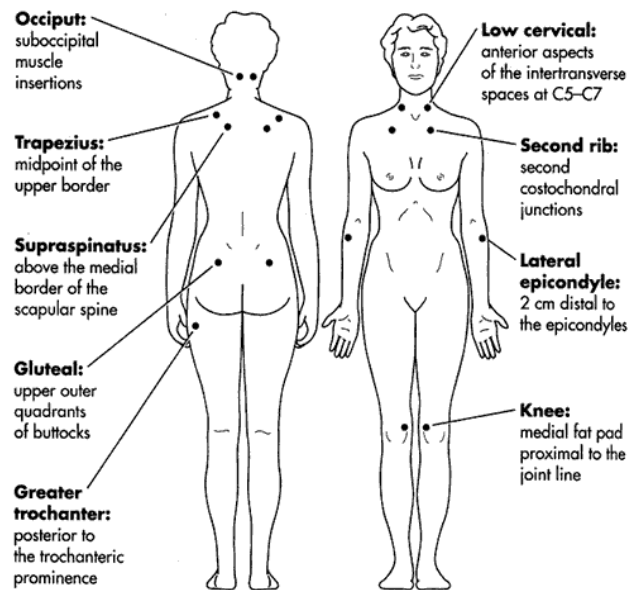

Figure 1.

Peer review only

1  
2  
3  
4  
5  
6  
7  
8  
9  
10  
11  
12  
13  
14  
15  
16  
17  
18  
19  
20  
21  
22  
23  
24  
25  
26  
27  
28  
29  
30  
31  
32  
33  
34  
35  
36  
37  
38  
39  
40  
41  
42  
43  
44  
45  
46  
47  
48  
49  
50  
51  
52  
53  
54  
55  
56  
57  
58  
59  
60

1  
2  
3  
4  
5  
6  
7  
8  
9  
10  
11  
12  
13  
14  
15  
16  
17  
18  
19  
20  
21  
22  
23  
24  
25  
26  
27  
28  
29  
30  
31  
32  
33  
34  
35  
36  
37  
38  
39  
40  
41  
42  
43

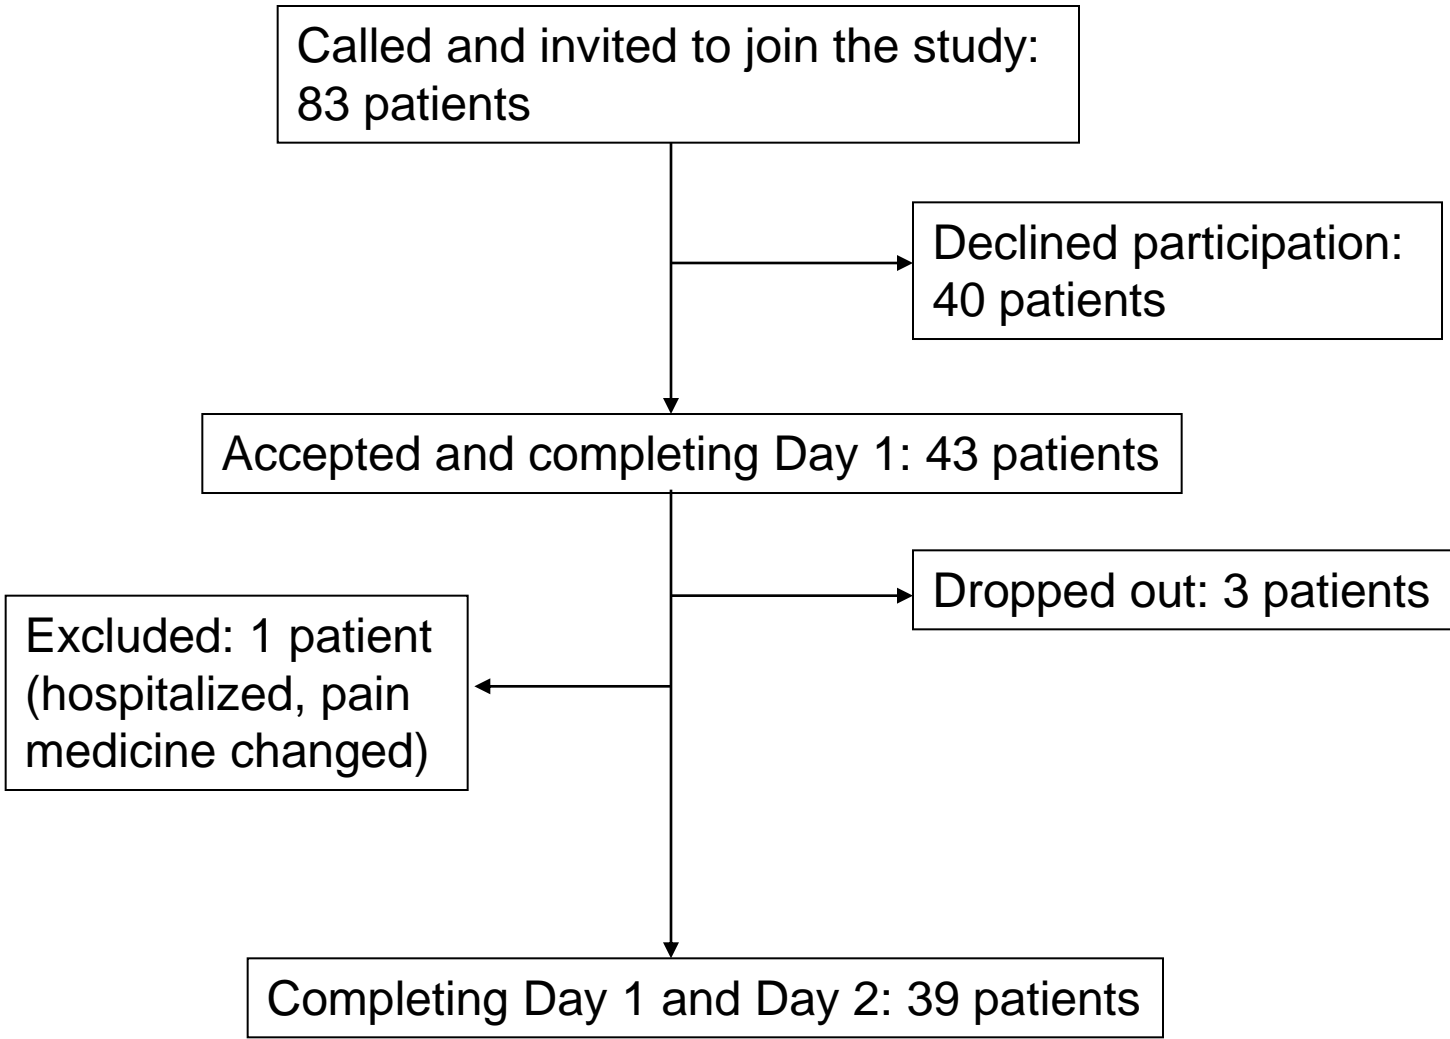

**Figure 2**

BMJ Open

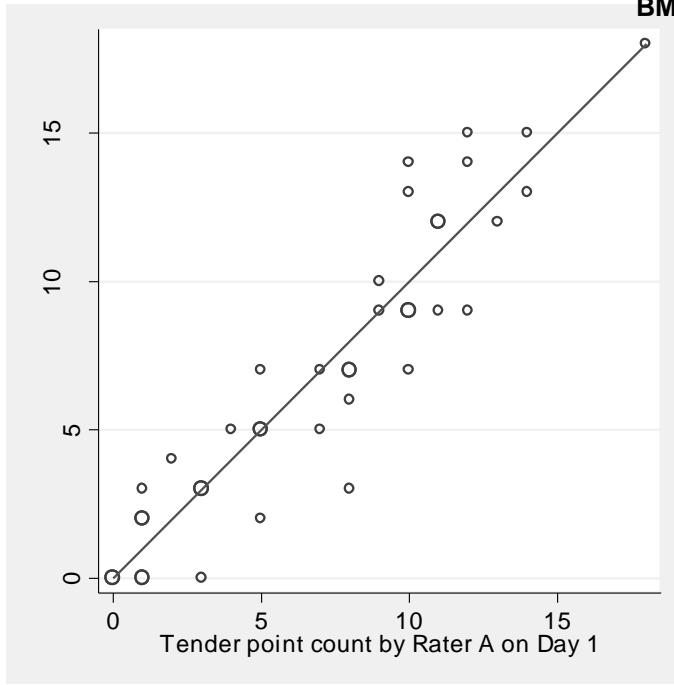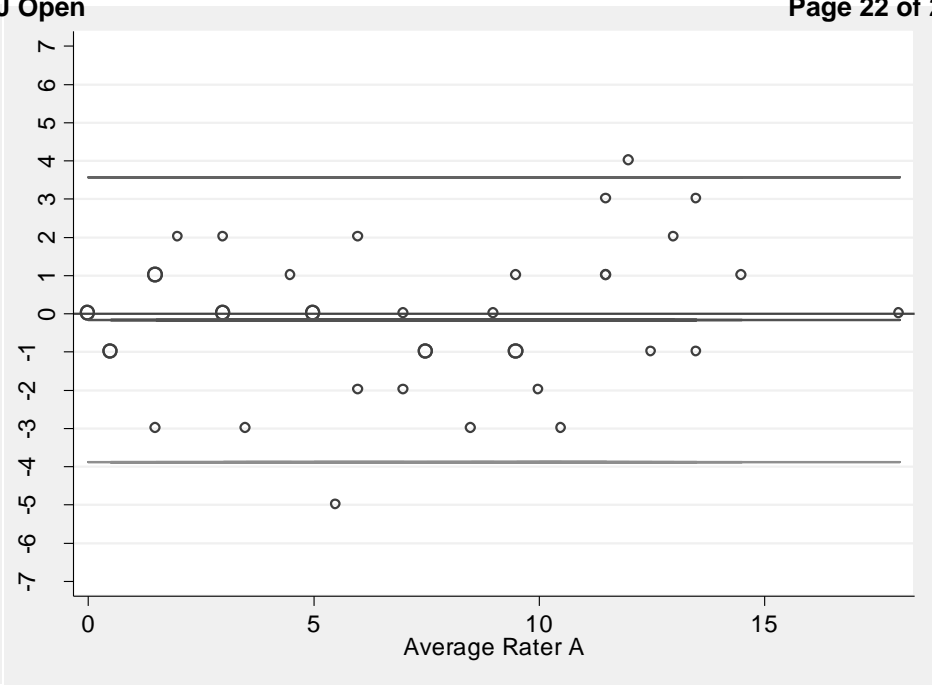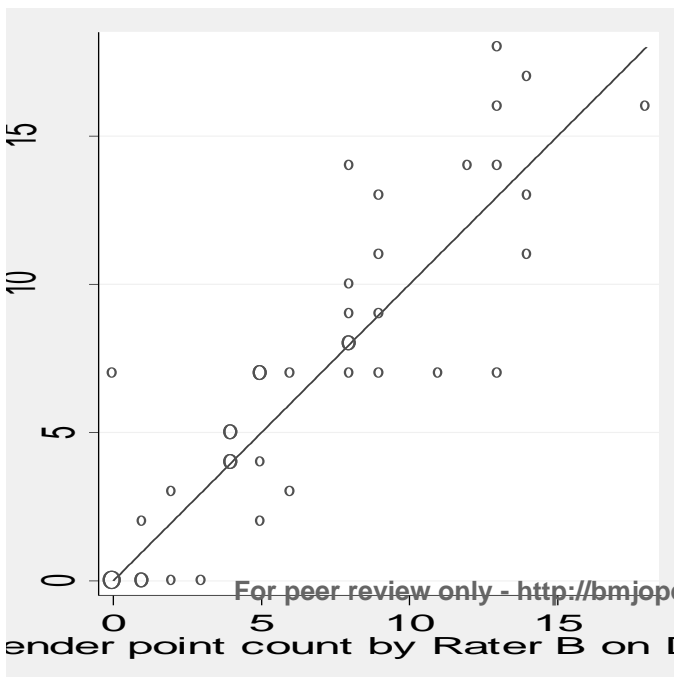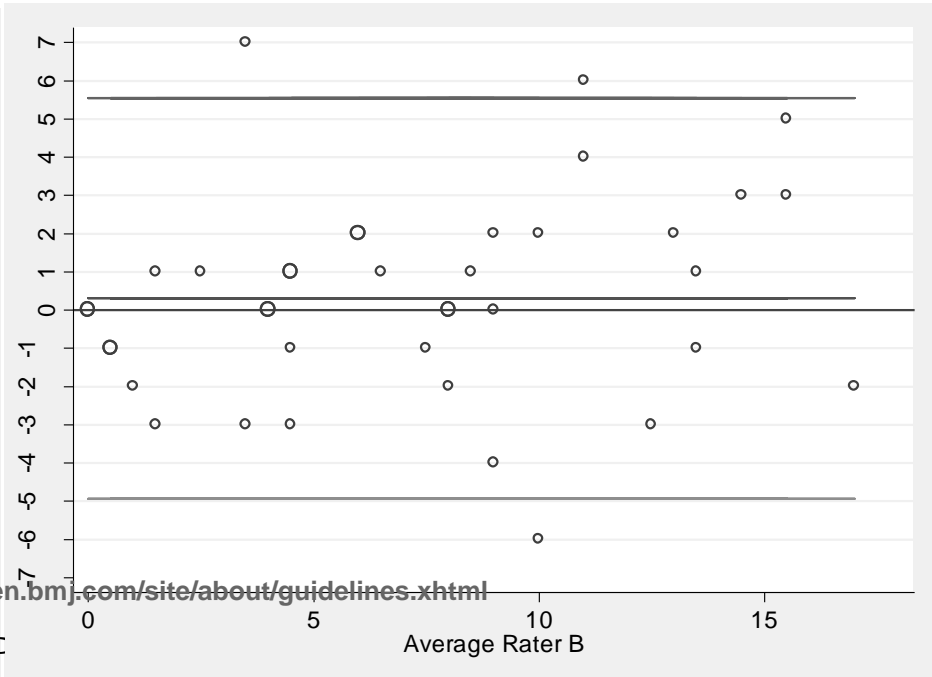

Figure 3

For peer review only - <http://bmjopen.bmj.com/site/about/guidelines.xhtml>

1  
2  
3  
4  
5  
6  
7  
8  
9  
10  
11  
12  
13  
14  
15  
16  
17  
18  
19  
20  
21  
22  
23  
24  
25  
26  
27  
28  
29  
30  
31  
32  
33  
34  
35  
36  
37  
38  
39  
40  
41  
42  
43

BMJ Open

1  
2  
3  
4  
5  
6  
7  
8  
9  
10  
11  
12  
13  
14  
15  
16  
17  
18  
19  
20  
21  
22  
23  
24  
25  
26  
27  
28  
29  
30  
31  
32  
33  
34  
35  
36  
37  
38  
39  
40  
41  
42

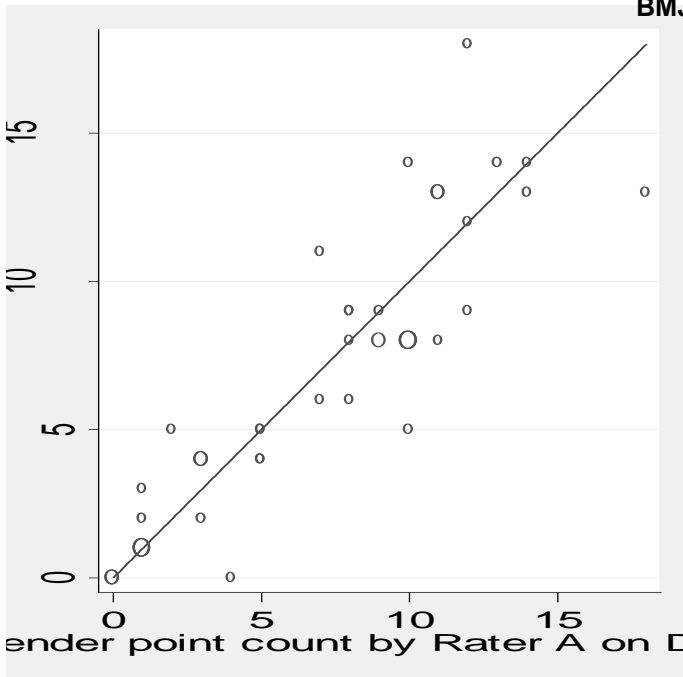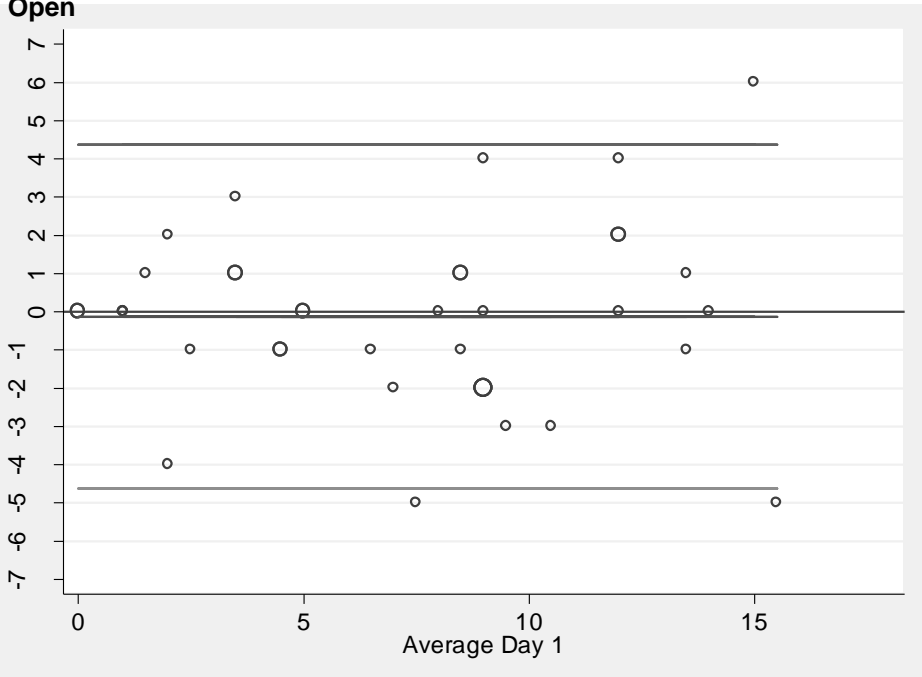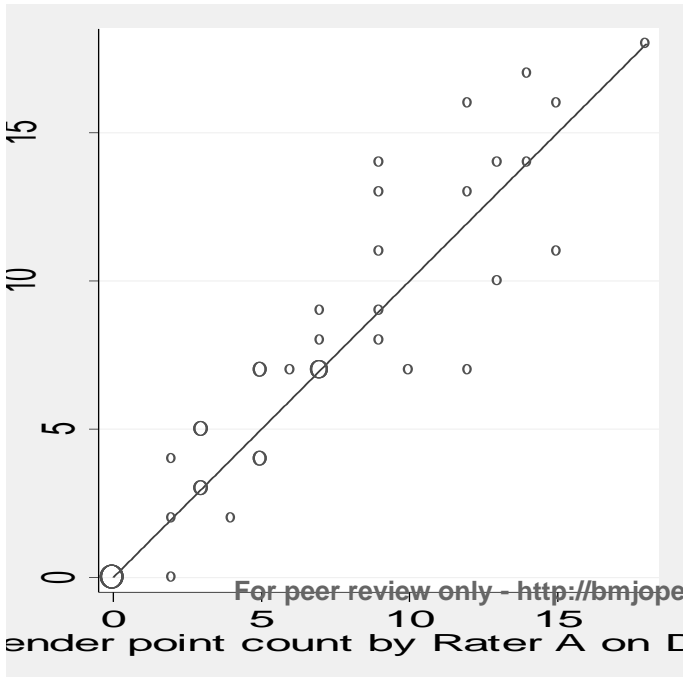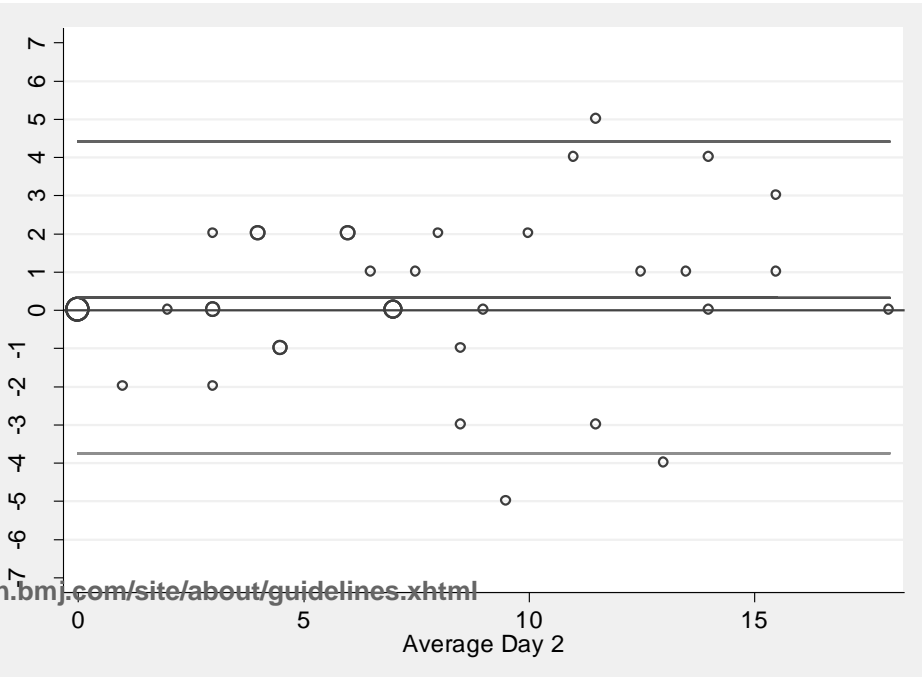

Figure 4

For peer review only - <http://bmjopen.bmj.com/site/about/guidelines.xhtml>



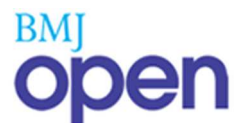

**Reproducibility of tender point examination in chronic low back pain patients as measured by intra- and interrater reliability and agreement: a validation study**

|                                 |                                                                                                                                                                                                                                                               |
|---------------------------------|---------------------------------------------------------------------------------------------------------------------------------------------------------------------------------------------------------------------------------------------------------------|
| Journal:                        | <i>BMJ Open</i>                                                                                                                                                                                                                                               |
| Manuscript ID:                  | bmjopen-2012-002532.R1                                                                                                                                                                                                                                        |
| Article Type:                   | Research                                                                                                                                                                                                                                                      |
| Date Submitted by the Author:   | 01-Feb-2013                                                                                                                                                                                                                                                   |
| Complete List of Authors:       | Jensen, Ole; Regional Hospital Silkeborg, Spine Center<br>Callesen, Jacob; Aarhus University, Department of Public Health<br>Nielsen, Merete; Regional Hospital Silkeborg, Spine Center<br>Ellingsen, Torkell; Aarhus University, Department of Public Health |
| <b>Primary Subject Heading</b>: | Rheumatology                                                                                                                                                                                                                                                  |
| Secondary Subject Heading:      | Diagnostics                                                                                                                                                                                                                                                   |
| Keywords:                       | RHEUMATOLOGY, STATISTICS & RESEARCH METHODS, Pain management                                                                                                                                                                                                  |
|                                 |                                                                                                                                                                                                                                                               |

SCHOLARONE™  
Manuscripts

1  
2  
3  
4 **Reproducibility of tender point examination in chronic low back pain patients as**  
5 **measured by intra- and interrater reliability and agreement: a validation study**  
6  
7

8 Ole K. Jensen<sup>1,3</sup>

9 Jacob Callesen<sup>2</sup>

10 Merete G. Nielsen<sup>1,3</sup>

11 Torkell Ellingsen<sup>2,3</sup>

12  
13  
14  
15  
16  
17  
18  
19  
20 <sup>1,3</sup> Spine Center, Diagnostic Center, Regional Hospital Silkeborg, Denmark.

21 <sup>2</sup> Institute of Public Health, Aarhus University, Denmark

22  
23 <sup>3</sup> Department of Rheumatology, Diagnostic Center, Region Hospital Silkeborg, Denmark  
24  
25  
26  
27  
28  
29  
30  
31  
32  
33  
34  
35  
36  
37  
38  
39  
40  
41  
42  
43  
44  
45

46 Address for correspondence: Ole Kudsk Jensen, Vestre Strandallé 158, 8240 Risskov

47 Tel: 004587227305, fax: 004587222750

48 E-mail: [olejesen@rm.dk](mailto:olejesen@rm.dk)  
49  
50  
51  
52

53 Keywords: Tender points, digital examination, low back pain, reliability, agreement  
54

55 Word count: 2,960  
56  
57  
58  
59  
60

## ABSTRACT

**Objectives:** To evaluate the reliability and agreement of digital tender point (TP) examination in chronic low back pain (LBP) patients.

**Design:** Cross-sectional study.

**Settings:** Hospital-based validation study.

**Participants:** Among sick-listed LBP patients referred from general practitioners for low back examination and return-to-work intervention, 43 and 39 patients (18 females, 46%) entered and completed the study, respectively.

**Main outcome measures:** The reliability was estimated by the intraclass correlation coefficient (ICC), and agreement was calculated for up to  $\pm 3$  TPs. Furthermore, the smallest detectable difference was calculated.

**Results:** TP examination was performed twice by two consultants in rheumatology and rehabilitation at 20 minutes intervals and repeated 1 week later. Intrarater reliability in the more and less experienced rater was ICC 0.84 (95% confidence interval (CI): 0.69–0.98) and 0.72 (CI: 0.49–0.95), respectively. The figures for interrater reliability were intermediate between these figures. In more than 70% of the cases the raters agreed within  $\pm 3$  TPs in both men and women and between test days. The smallest detectable difference between raters was 5, and for the more and less experienced rater it was 4 and 6 TPs, respectively.

**Conclusions:** The reliability of digital TP examination ranged from acceptable to excellent, and agreement was good in both men and women. The smallest detectable differences varied from 4 to 6 TPs. Thus, TP examination in our hands was a reliable, but not a precise instrument. Digital TP examination may be useful in daily clinical practice, but regular use and training sessions are required to secure quality of testing.

## ARTICLE SUMMARY

### Article Focus

- Diffuse hyperalgesia may be evaluated by tender point examination and may reflect deficient descending pain inhibition as in fibromyalgia.
- Tender point examination is increasingly relevant to improve clinical assessment in inflammatory as well as non-inflammatory rheumatologic disorders.
- Reproducibility of this examination technique is not well documented and was therefore investigated.

### Key messages

- In sick-listed chronic low back pain patients digital tender point examination was a reliable, but not a precise instrument.
- In both women and men there was more than 70% agreement within +/- 3 tender points.
- The method was quick and easy to use with no requirement for equipment, except in initial training sessions.

### Strengths and limitations

- The study included a well defined chronic low back pain population that was referred from general practitioners for low back pain examination and return-to-work intervention.
- The number of patients was limited and only two raters were involved resulting in wide confidence intervals and limited generalizability.

## INTRODUCTION

Tender point (TP) examination has been the cornerstone examination in patients with chronic widespread pain (CWP) to distinguish fibromyalgia patients from patients with CWP only. In the general population, the former and the latter condition have been identified in 0.5–4%<sup>1</sup> and 10–13%,<sup>2,3</sup> respectively. Persons fulfilling the fibromyalgia criteria (CWP &  $\geq 11$  TPs) report more pain and more disability than persons with CWP who have less than 11 TPs.<sup>4</sup> TP examination is performed by standardised digital palpation at 18 points symmetrically distributed on the body (Figure 1).<sup>5</sup> In the general population, men and women had a median of 3 and 6 TPs, respectively,<sup>6</sup> and women may have up to 4 TPs more than men.<sup>7</sup>

TP examination may be relevant in conditions other than CWP or regional pain syndromes. In inflammatory rheumatic diseases, TP examination may also contribute to the clinical evaluation. For instance, high disease activity in the absence of inflammatory activity in rheumatoid arthritis is often seen in patients with many TPs.<sup>8</sup> This may lead to inappropriate treatment of disease activity. In systemic lupus erythematosus, health status has been shown to be inferior in patients with many TPs as compared to patients with few TPs.<sup>9</sup>

In sick-listed low back pain (LBP) patients, the intensity of back pain is associated with the number of TPs, and patients with radiculopathy have fewer TPs than patients with non-specific LBP.<sup>10</sup> Furthermore, TPs are associated with the reporting of widespread pain and with long-term prognosis.<sup>11</sup> According to another study,<sup>12</sup> patients with both CWP and non-specific LBP have more pain, higher disability and more TPs than patients with LBP only.

Reliability and agreement studies are, however, few and insufficient. The original study defining fibromyalgia<sup>5</sup> included 293 patients and 265 controls. Since then, we have been able to identify only three small studies comparing the reliability of digital palpation and dolorimetry with TPs defined as in the original study.<sup>13–15</sup> Each study included 15–25 individuals. The reliability was acceptable and comparable for both dolorimetry and digital palpation, and Kappa-values of 0.44–0.92 were reported for the digital examination. However, only the reliability of testing each TP location as positive was estimated, not the reliability of the total TP counts. In other non-specific pain studies, the reliability of TP examination was not formally tested, or digital examination was not used.<sup>16–20</sup>

Since the total TP count – and not each single TP – is used for the clinical evaluation in rheumatologic conditions, more reliability and agreement studies of the total TP count are needed.

1  
2  
3  
4 Accordingly, the purpose of the present study was to investigate the reproducibility of total TP  
5 counts based on digital TP examination in chronic sick-listed LBP patients in terms of 1) intra- and  
6 interrater reliability and 2) intra- and interrater agreement.  
7  
8

## 9 10 **METHODS**

11 The patients were recruited among patients referred from their general practitioners to the Spine  
12 Center for participation in a controlled study.  
13

14 Inclusion criteria: partly or fully sick-listed for more than 4 weeks due to LBP with or without  
15 radiculopathy, LBP should be the prime reason for sick-listing and at least as bothersome as pain  
16 elsewhere, age 16-60 years, referred from a well-defined geographical area of about 280,000  
17 inhabitants, and the patient should be able to speak and understand Danish.  
18

19 Exclusion criteria: living outside the referral area, continuing or progressive radiculopathy resulting  
20 in plans for surgery, low back surgery within the last year, previous lumbar fusion operation,  
21 suspected cauda equina syndrome, progressive paresis or other serious back disease, (e.g. tumour),  
22 pregnancy, known dependency on drugs or alcohol, or primary psychiatric disease.  
23

24 Except for the duration of sick-listing, which was longer than 4 weeks in some of the patients, all  
25 participants fulfilled the above criteria.  
26

27 The patients were contacted between 1<sup>st</sup> November 2009 and 1<sup>st</sup> March 2010 and were only  
28 included in the present study after more than 3 weeks had passed since their first consultation at the  
29 Spine Center. They were offered participation in the study by one of the authors (JC) who was the  
30 leader of the project but was not a staff member, and they were told that the investigation had  
31 nothing to do with the management of their LBP. The patients were informed that the examination  
32 would only include measuring of diffuse tenderness by TP examination and spinal range of motion  
33 (not reported in this paper). Previously, all patients had been subjected to a clinical low back  
34 examination and TP examination at their first consultation at the Spine Center.  
35

36 The examinations were performed by two clinicians (OKJ & MGN), both consultants in  
37 rheumatology and rehabilitation. Beforehand, the TP examination method was taught by the more  
38 experienced rater (OKJ = Rater A) to the less experienced rater (MGN = Rater B) during a 2-hour  
39 session. Each test day, before starting examinations, the two raters calibrated their thumbs with a  
40 dolorimeter,<sup>21</sup> which was able to register four pressures at a time and calculate means and standard  
41 deviations.  
42  
43  
44  
45  
46  
47  
48  
49  
50  
51  
52  
53  
54  
55  
56  
57  
58  
59  
60

1  
2  
3  
4 The examinations were performed during 2 test days, day 1 and day 2, at 1 week intervals. To  
5 include all patients, the test days were repeated twice. The patients were randomised so that half of  
6 the patients were first tested by Rater A, the other half first by Rater B, but keeping the same  
7 sequence on day 2 as on day 1. Twenty minutes passed between the examinations.  
8

9  
10 Before examination, the patients filled out a questionnaire including questions regarding back+leg  
11 pain<sup>22</sup> and disability,<sup>23</sup> increasing scores representing increasing pain and disability. At the clinical  
12 examination, the patient's range of spinal motion was first measured in the standing position.  
13  
14 Subsequently, the patient was asked to lie prone, and a 4-kg digital pressure was demonstrated on  
15 the distal, dorsal aspect of the forearm. The patient was instructed in the following way: "This is a  
16 firm pressure. Afterwards, this pressure will be applied on different spots on the body. At every  
17 spot, I would like you to report if the pressure is painful or is felt like firm pressure." The TPs  
18 (figure 1) were tested in a standardised manner from right to left, first testing the medial fat pads of  
19 the knees and the posterior aspects of the greater trochanter. Afterwards, with the patient seated, the  
20 spots were tested from top and downwards as follows: the suboccipital muscle insertions, the  
21 anterior-lateral aspect of the intertransverse aspects of C5-7, the midpoints of the upper borders of  
22 trapezius, the medial parts of the supraspinatus, the costo-chondral junctions of costa 2, the forearm  
23 2 cm distal to the epicondyles, and the outer upper quadrants of the buttocks. The patients were  
24 instructed not to tell the result of the TP examination to the raters or others.  
25  
26

27  
28 Positive TPs (e.g. pressures causing pain) were memorised by the raters and summed up to the total  
29 number of TPs (the TP count). The procedure lasted 6-8 minutes per examination. A secretary was  
30 associated with each rater. The TP counts were reported to this secretary, who passed the data to the  
31 project leader (JC). In this way the raters were blinded in relation to each other.  
32  
33

34 The secretary also registered pain response at every single tender point location.  
35  
36

### 37 38 39 40 41 42 43 44 **Statistical analyses**

45 The requirement for testing intra- and interrater reliability was planned to include a sample size of  
46 at least 40 persons.<sup>24</sup> The TP counts were distributed as discrete numerical variables and were  
47 normally distributed. For the quantification of intra- and interrater reproducibility of tender point  
48 examination, two types of analysis were applied: the intraclass correlation coefficient (ICC) and the  
49 Bland-Altman method for assessing agreement.<sup>25 26</sup> ICC provides information on the ability to  
50 differentiate between the variation between subjects and measurement variation. The ICC was  
51 defined as the ratio of variance among patients (subject variability) over the total variance (subject  
52  
53  
54  
55  
56  
57  
58  
59  
60

1  
2  
3  
4 variability, observer variability and measurement variability). ICC ranges between 0 (no reliability)  
5 and 1 (perfect reliability), and values of ICCs are excellent when  $> 0.75$  and poor when  $< 0.40$ .

6  
7 Results between these ranges represent moderate to good reliability.<sup>27</sup> According to another  
8  
9 reference, ICC  $> 0.7$  is considered good.<sup>25</sup>

10 The Bland-Altman method provides insight into the distribution of differences in relation to mean  
11 values.<sup>28</sup> Agreement was quantified by calculating the mean difference between two sets of  
12 observations and the standard deviation (SD) for this difference. The closer the mean difference was  
13 to 0 and the smaller the SD of this difference, the better the agreement. The differences were  
14 depicted in relation to the mean values. The 95% limits of agreement were defined as the mean  
15 difference between the raters  $\pm 1.96 \times \text{SD}_{\text{of the difference}}$ . Furthermore, agreement within  $\pm 1$  TPs and  
16  $\pm 3$  TPs was calculated.

17 To determine whether a real change in outcome has occurred in clinical practice and research, a  
18 change must be at least the smallest detectable difference (SDD) of a measurement procedure.<sup>25</sup> The  
19 SDD was calculated as  $1.96 \times \sqrt{(2 \times \text{SEM}^2)}$ , where the standard error of measurement (SEM) was  
20 defined as  $\text{SD}_{\text{of the difference}}/\sqrt{2}$ . SDD was calculated and rounded up to the nearest whole number.

21  
22 Cronbach's alpha is a measure of internal consistency, i.e. that different items of a test battery are  
23 intercorrelated and measure the same construct. Values  $> 0.9$  are considered excellent.

24  
25 The reliability of each tender point location was measured by Kappa statistics.

26  
27  
28  
29  
30  
31  
32  
33  
34  
35

## 36 RESULTS

37 Eighty-three patients were invited to join the study, and 39 patients completed both test days (figure  
38 2). Four patients dropped out from day 1 to day 2, three without explanation, the fourth was  
39 excluded because of hospital admission and change of pain medication between the two test days.  
40 Pain medication was unchanged in the other patients.

41  
42  
43 Baseline characteristics are displayed in table 1.

44  
45  
46

### 47 *Intrarater reliability and agreement*

48 The mean TP count was 7 and differed little between test days (table 2). The intraclass correlation  
49 coefficient (ICC) in Rater A was excellent, 0.83 (95% confidence interval (CI) 0.69-0.98),  
50 reflecting a high degree of reliability. ICC was somewhat lower, but still good in Rater B, 0.72 (CI  
51 0.49-0.95). The relations between TP counts on days 1 and 2 are graphically displayed in figure 3  
52  
53  
54  
55  
56  
57  
58  
59  
60



1  
2  
3  
4 (left panel). The circles representing more than one observation were all located near the equality  
5 lines, and the observations were distributed over the whole range of TP counts.

6  
7 In about half of the observations, agreement was within  $\pm 1$  TP. For both raters more than 75% of  
8 the TP counts were within  $\pm 3$  TPs in both sexes. The limits of agreement were within  $\pm 4$  and  $\pm$   
9 6 TPs for Rater A and B, respectively (figure 3 right panel), corresponding to the smallest  
10 detectable differences (SDD) (table 2). Measurement errors (SEM) were 1.34 ( $=1.90/\sqrt{2}$ ) and 1.89  
11 ( $=2.68/\sqrt{2}$ ) for Rater A and Rater B, respectively. Cronbach's alpha was 0.96 and 0.92 for Rater A  
12 and B, respectively.  
13  
14  
15  
16  
17

### 18 19 *Interrater reliability and agreement*

20 The mean differences of TP counts differed little between the two raters (Table 3). The relations  
21 between TP counts of Rater A and Rater B are shown in figure 4, left panel, and limits of agreement  
22 in the right panel. The circles representing more than one observation were all located near the  
23 equality and zero lines. On both test days ICC was higher than 0.75. In more than 70% of the cases,  
24 Rater B agreed with Rater A regarding  $\pm 3$  TPs in both men and women. The limits of agreement  
25 were within  $\pm 5$  TPs corresponding to SDD of 5 TPs. Measurement errors (SEM) were 1.63  
26 ( $=2.30/\sqrt{2}$ ) and 1.47 ( $=2.08/\sqrt{2}$ ) on day 1 and day 2, respectively. Cronbach's alpha was 0.94 and  
27 0.96 on day 1 and 2, respectively.  
28  
29  
30  
31  
32  
33  
34

### 35 36 *Reliability of testing each tender point location*

37 In Appendix is shown the reliability of testing each tender point location. Agreement varied from  
38 69% to 90%, and Kappa values varied from 0.13 to 0.89.  
39  
40  
41

## 42 **DISCUSSION**

43 The present study showed that digital TP examination resulted in total TP counts with acceptable to  
44 excellent reliability when calibration of the thumbs with a dolorimeter was performed before the  
45 testing. This indicated that the measurement error, which was less than 2 TPs, was considerably  
46 smaller than the variation between individuals. The lesser experienced Rater B did not perform as  
47 well as the more experienced Rater A, and this was especially evident on comparison of the lower  
48 limits of the confidence intervals. However, the reliability of Rater B was acceptable, but more  
49 training and regular use would probably improve the results. Training has been shown to reduce the  
50 variability in applying a 4-kg digital force.<sup>29</sup>  
51  
52  
53  
54  
55  
56  
57  
58  
59  
60

1  
2  
3  
4 Agreement is independent of the variation between subjects. We consider an agreement of more  
5 than 70% as good, and it was found for +/-3 TPs in both men and women, indicating that digital TP  
6 examination in daily practice may be used, keeping in mind the uncertainty of +/-3 TPs. This part of  
7 the result was especially important, since we found that TP counts were higher in women than in  
8 men, in line with other studies. In the general population, TP counts of more than 10 and 6 have  
9 been identified in 10-20% of women and men, respectively.<sup>6,7</sup> Thus, a TP count of 9 may be normal  
10 in women, but high in men.

11  
12 The median TP count of 8 was elevated as compared to the median TP count in the general  
13 population which is between 3 and 6 TPs.<sup>6</sup> Previously, it has been shown that TP counts were  
14 elevated in regional pain conditions as compared to pain-free controls, but lower than in  
15 fibromyalgia.<sup>30</sup>

16  
17 However, SDD ranged from 4 to 6, indicating less precision of TP examination than reliability.  
18 Thus, according to the present study, TP examination may result in TP counts that may differentiate  
19 between high, intermediate or low levels, but not between different levels in the low or high range.  
20 Moreover, TP examination – as used in the present study – would not be sufficiently precise to  
21 differentiate patients with higher or lower TP counts than 10/11 TPs such as are used in the  
22 diagnosis of fibromyalgia.

23  
24 Accordingly, a SDD of 4-6 was not impressive, but not so different from other measures in LBP.  
25 The minimal detectable change, which is defined closely to SDD,<sup>25,31</sup> has been shown to be 4-5  
26 points in the Roland Morris Questionnaire,<sup>32</sup> a commonly used instrument in LBP.

27  
28 In fibromyalgia, the peripheral sensory thresholds are normal, but pain processing is augmented,  
29 primarily due to dysfunction of the descending pain inhibition system in the brainstem.<sup>33</sup> In the  
30 present study, the patients were sick-listed because of chronic LBP, and we have previously  
31 presented data making it plausible that LBP can partly be explained by mechanisms similar to  
32 those seen in fibromyalgia patients.<sup>10</sup>

33  
34 We found high internal consistency, as all Cronbach's alpha values were above 0.90. This may  
35 support the assumption that TP counts measure the same construct, e.g. insufficient pain inhibition,  
36 rather than local abnormality. Therefore, in chronic LBP patients, TPs may be interpreted as  
37 follows: A high TP count may indicate an insufficiently functioning descending pain inhibition  
38 system, whereas a low TP count may indicate a well-functioning system. TP counts in the middle of  
39 the distribution are inconclusive. The present study does not provide sufficient data to set limits for  
40 high or low TP counts in LBP patients.  
41  
42  
43  
44  
45  
46  
47  
48  
49  
50  
51  
52  
53  
54  
55  
56  
57  
58  
59  
60

1  
2  
3  
4 In the present chronic LBP population, there was no significant change in TP counts during 1 week.  
5 We could have chosen a shorter or longer interval, but 1 week was chosen for pragmatic reasons,  
6 because we assumed that 1 week would not be too long in a patient population with long-lasting  
7 pain. One might expect more change in TP counts during 1 week in patients with acute LBP. A  
8 systematic difference in TP count between the first and second TP examination might have  
9 occurred, but such a potential difference was not apparent because the raters were randomised to be  
10 either the first or second rater.  
11  
12  
13  
14  
15

16  
17 The value of TP examination has been questioned. Firstly, the examination method may be  
18 unreliable, because the pain response may be affected by expectations<sup>1</sup> or distress.<sup>34</sup> When the  
19 examination is performed randomly with the patient blinded for the pressure gradient, the results are  
20 different as compared to non-blinded testing.<sup>34 35</sup> Secondly, it may be inadequate to use a sharp cut-  
21 point ( $\geq 11$  TPs) to distinguish health from disease in pain conditions.<sup>36</sup> At present, fibromyalgia is  
22 considered part of a larger continuum.<sup>37 38</sup> Thirdly, there have been problems with implementation  
23 of the examination technique, especially in primary care. Often, it has been incorrectly performed,  
24 and some physicians have refused to use the method.<sup>39</sup>  
25  
26  
27  
28  
29

30 Therefore, new criteria for diagnosing fibromyalgia have been developed and validated. These  
31 criteria do not include TP examination, and therefore they will enable clinicians and researchers to  
32 diagnose fibromyalgia by surveys. However, the new criteria were not meant to replace the original  
33 ACR criteria, but to represent an alternative method of diagnosis,<sup>39</sup> and the new criteria have not  
34 been tested in rheumatic conditions and may not be relevant in patients with inflammatory  
35 rheumatic diseases. In these conditions, fibromyalgia symptoms may be caused by the rheumatic  
36 disease and not by dysfunction of the descending pain inhibition system. Therefore, TP examination  
37 will still be relevant both at present and in the future.  
38  
39  
40  
41  
42  
43

44 The reliability of testing each tender point location was not different from previous reporting in the  
45 literature.<sup>13-15</sup>  
46  
47

#### 48 *Strengths*

49 The present study was conducted in a well-defined population recruited by general practitioners on  
50 the basis of sick-listing due to LBP, and all had chronic LBP. TPs were normally distributed,  
51 making it possible to analyze data with parametric methods.  
52  
53  
54  
55  
56  
57  
58  
59  
60

### *Weaknesses*

The number of patients was small, resulting in wide confidence intervals of ICC, and only two raters participated. If more raters had participated, the results would be more generalisable.

### *Perspectives*

The possible advantages of using TP examination in LBP patients include ease and speed, no requirement for equipment, and good reliability and agreement. Furthermore, malingering or appealing distress will probably not induce bias in LBP patients, who do not know what to prefer, many or few tender points.

The possible disadvantages include lack of precision and the need for training and equipment (dolorimeter).

We need to know more about the variability of the TP count over time, and we need reproducibility studies comparing TP counts with other measures of dysfunction of the descending pain inhibiting system.<sup>37</sup> As an example, lack of cold tolerance has been documented in whiplash patients with prolonged symptoms.<sup>40</sup> TP counts may be compared with cold tolerance.

Furthermore, it would be interesting to see reliability and agreement studies of the total TP count in fibromyalgia patients and patients with inflammatory rheumatic diseases. Findings resembling the results of the present study may have implications for the fibromyalgia criteria.

### *Conclusion*

Digital TP examination in sick-listed chronic LBP patients was a reliable, but not a precise instrument. More reliability and agreement studies are needed in LBP patients and other populations, including patients with inflammatory rheumatic diseases.

### **Acknowledgements**

The authors thank Senior Biostatistician Robin Christensen, MSc, PhD, Head of Musculoskeletal Statistics Unit, The Parker Institute, Copenhagen University Hospital, Denmark, for invaluable help with the statistical analyses.

### **Funding**

The study was supported by The Research Fund of Regional Hospital Silkeborg, Denmark.

### **Competing interests**

None

### **Ethics approval**

All patients signed informed consent. The study was reported to the Regional Ethics Committee, who answered that approval was not necessary because only methodology was studied. The study was reported to the Danish Data Protection Agency (No. 2007-58-0010).

### **Author contributions**

Jacob Callesen (JC), Ole K. Jensen (OKJ) and Torkell Ellingsen (TE) planned the study. JC designed the study in detail and was responsible for acquisition of data and obtaining funding. Merete G. Nielsen (MGN) and OKJ performed the clinical examinations. JC and OKJ were responsible for analysing and interpreting the data. OKJ wrote the manuscript, which was again revised by JC, TE and MGN. OKJ was responsible for administrative and technical support. All authors discussed the results and commented on the manuscript.

## REFERENCES

1. Clauw DJ, Crofford LJ. Chronic widespread pain and fibromyalgia: what we know, and what we need to know. *Best.Pract.Res.Clin.Rheumatol* 2003;17:685-701.
2. Macfarlane GJ, Pye SR, Finn JD, *et al.* Investigating the determinants of international differences in the prevalence of chronic widespread pain: evidence from the European Male Ageing Study. *Ann.Rheum.Dis* 2009;68:690-5.
3. Bergman S, Herrstrom P, Hogstrom K, *et al.* Chronic musculoskeletal pain, prevalence rates, and sociodemographic associations in a Swedish population study. *J.Rheumatol.* 2001;28:1369-77.
4. Coster L, Kendall S, Gerdle B, *et al.* Chronic widespread musculoskeletal pain - a comparison of those who meet criteria for fibromyalgia and those who do not. *Eur.J Pain* 2008;12:600-10.
5. Wolfe F, Smythe HA, Yunus MB, *et al.* The American College of Rheumatology 1990 Criteria for the Classification of Fibromyalgia. Report of the Multicenter Criteria Committee. *Arthritis Rheum.* 1990;33:160-72.
6. Croft P, Schollum J, Silman A. Population study of tender point counts and pain as evidence of fibromyalgia. *BMJ* 1994;309:696-9.
7. Wolfe F, Ross K, Anderson J, *et al.* Aspects of fibromyalgia in the general population: sex, pain threshold, and fibromyalgia symptoms. *J Rheumatol* 1995;22:151-6.
8. Ton E, Bakker MF, Verstappen SM, *et al.* Look beyond the disease activity score of 28 joints (DAS28): tender points influence the DAS28 in patients with rheumatoid arthritis. *J Rheumatol.* 2012;39:22-7.
9. Akkasilpa S, Goldman D, Magder LS, *et al.* Number of fibromyalgia tender points is associated with health status in patients with systemic lupus erythematosus. *J Rheumatol.* 2005;32:48-50.
10. Jensen OK, Nielsen CV, Stengaard-Pedersen K. Low back pain may be caused by disturbed pain regulation: a cross-sectional study in low back pain patients using tender point examination. *Eur.J Pain* 2010;14:514-22.
11. Jensen OK, Nielsen CV, Stengaard-Pedersen K. One-year prognosis in sick-listed low back pain patients with and without radiculopathy. Prognostic factors influencing pain and disability. *Spine J* 2010;10:659-75.
12. Nordeman L, Gunnarsson R, Mannerkorpi K. Prevalence and characteristics of widespread pain in female primary health care patients with chronic low back pain. *Clin J Pain.* 2012;28:65-72.
13. Cott A, Parkinson W, Bell MJ, *et al.* Interrater reliability of the tender point criterion for fibromyalgia. *J Rheumatol.* 1992;19:1955-9.
14. Tunks E, McCain GA, Hart LE, *et al.* The reliability of examination for tenderness in patients with myofascial pain, chronic fibromyalgia and controls. *J Rheumatol.* 1995;22:944-52.
15. Rasmussen JO, Smidth M, Hansen TM. [Examination of tender points in soft tissue. Palpation versus pressure-algometer]. *Ugeskr.Laeger* 1990;152:1522-6.

16. Maquet D, Croisier JL, Demoulin C, *et al.* Pressure pain thresholds of tender point sites in patients with fibromyalgia and in healthy controls. *Eur.J Pain* 2004;8:111-7.
17. McVeigh JG, Finch MB, Hurley DA, *et al.* Tender point count and total myalgic score in fibromyalgia: changes over a 28-day period. *Rheumatol.Int* 2007;27:1011-8.
18. Tastekin N, Uzunca K, Sut N, *et al.* Discriminative value of tender points in fibromyalgia syndrome. *Pain Med* 2010;11:466-71.
19. Tastekin N, Birtane M, Uzunca K. Which of the three different tender points assessment methods is more useful for predicting the severity of fibromyalgia syndrome? *Rheumatol.Int* 2007;27:447-51.
20. Harden RN, Revivo G, Song S, *et al.* A critical analysis of the tender points in fibromyalgia. *Pain Med* 2007;8:147-56.
21. Commander Algometry. 2004. JTECH Medical, 470 Lawndale Drive, Salt Lake City, 84115 Utah,
22. Manniche C, Asmussen K, Lauritsen B, *et al.* Low Back Pain Rating scale: validation of a tool for assessment of low back pain. *Pain* 1994;57:317-26.
23. Albert HB, Jensen AM, Dahl D, Rasmussen MN. [Criteria validation of the Roland Morris questionnaire. A Danish translation of the international scale for the assessment of functional level in patients with low back pain and sciatica]. *Ugeskr.Laeger* 2003;165:1875-80.
24. Hopkins WG. Measures of reliability in sports medicine and science. *Sports Med* 2000;30:1-15.
25. de Vet HC, Terwee CB, Knol DL, *et al.* When to use agreement versus reliability measures. *J Clin Epidemiol.* 2006;59:1033-9.
26. Kottner J, Audige L, Brorson S, *et al.* Guidelines for Reporting Reliability and Agreement Studies (GRRAS) were proposed. *Int J Nurs.Stud.* 2011;48:661-71.
27. Andresen EM. Criteria for assessing the tools of disability outcomes research. *Arch Phys Med Rehabil.* 2000;81:S15-S20.
28. Bland JM, Altman DG. Statistical methods for assessing agreement between two methods of clinical measurement. *Lancet* 1986;1:307-10.
29. Smythe H. Examination for tenderness: learning to use 4 kg force. *J Rheumatol.* 1998;25:149-51.
30. Granges G, Littlejohn G. Pressure pain threshold in pain-free subjects, in patients with chronic regional pain syndromes, and in patients with fibromyalgia syndrome. *Arthritis Rheum.* 1993;36:642-6.
31. Stauffer ME, Taylor SD, Watson DJ, *et al.* Definition of nonresponse to analgesic treatment of arthritic pain: an analytical literature review of the smallest detectable difference, the minimal detectable change, and the minimal clinically important difference on the pain visual analog scale. *Int J Inflamm.* 2011; 2011: Article ID 231926, 6 pages. doi:10.4061/2011/231926.
32. Stratford PW, Binkley J, Solomon P, *et al.* Defining the minimum level of detectable change for the Roland-Morris questionnaire. *Phys Ther.* 1996;76:359-65.

- 1  
2  
3  
4 33. Nielsen LA, Henriksson KG. Pathophysiological mechanisms in chronic musculoskeletal pain  
5 (fibromyalgia): the role of central and peripheral sensitization and pain disinhibition.  
6 *Best.Pract.Res.Clin.Rheumatol* 2007;21:465-80.  
7  
8 34. Petzke F, Gracely RH, Park KM, *et al.* What do tender points measure? Influence of distress on 4  
9 measures of tenderness. *J Rheumatol.* 2003;30:567-74.  
10  
11 35. Harris RE, Gracely RH, McLean SA, *et al.* Comparison of clinical and evoked pain measures in  
12 fibromyalgia. *J Pain* 2006;7:521-7.  
13  
14 36. Wolfe F. The relation between tender points and fibromyalgia symptom variables: evidence that  
15 fibromyalgia is not a discrete disorder in the clinic. *Ann.Rheum.Dis* 1997;56:268-71.  
16  
17 37. Arendt-Nielsen L, Graven-Nielsen T. Central sensitization in fibromyalgia and other musculoskeletal  
18 disorders. *Curr.Pain Headache Rep.* 2003;7:355-61.  
19  
20 38. Perrot S, Dickenson AH, Bennett RM. Fibromyalgia: harmonizing science with clinical practice  
21 considerations. *Pain Pract* 2008;8:177-89.  
22  
23 39. Wolfe F, Clauw DJ, Fitzcharles MA, *et al.* The American College of Rheumatology preliminary  
24 diagnostic criteria for fibromyalgia and measurement of symptom severity. *Arthritis Care Res*  
25 *(Hoboken.)* 2010;62:600-10.  
26  
27 40. Kasch H, Qerama E, Bach FW, Jensen TS. Reduced cold pressor pain tolerance in non-recovered  
28 whiplash patients: a 1-year prospective study. *Eur J Pain.* 2005;9:561-9.  
29  
30  
31  
32  
33  
34  
35  
36  
37  
38  
39  
40  
41  
42  
43  
44  
45  
46  
47  
48  
49  
50  
51  
52  
53  
54  
55  
56  
57  
58  
59  
60



## LEGENDS FOR FIGURES

**Figure 1** Locations of tender points according to American College of Rheumatology<sup>5</sup>.

**Figure 2** Flow-chart.

**Figure 3** Intrarater reliability and agreement. Reliability with lines of equality shown in left panel. Agreement shown by Bland-Altman plots in right panel displaying differences of tender point (TP) counts on y-axes and average of TP counts on x-axes. The upper and the lower horizontal line represent 95% limits of agreement. Areas of the circles are proportional to the number of observations.

**Figure 4** Interrater reliability and agreement. Reliability with lines of equality shown in left panel. Agreement shown by Bland-Altman plots in right panel displaying differences of tender point (TP) counts on y-axes and the average of TP counts on x-axes. The upper and the lower horizontal line represent 95% limits of agreement. Areas of the circles are proportional to the number of observations.

**Table 1** Baseline characteristics

| <b>Variables</b>                     |              |
|--------------------------------------|--------------|
| Sex (men/women)                      | 21/18        |
| Age (mean, range)                    | 42.0 (24–58) |
| Back+leg pain (0–60, median, range ) | 22 (2–50)    |
| Disability (0–23, median, range)     | 14 (0–23)    |
| Tender points* (0–18, median, range) | 8 (0–18)     |
| Duration of pain (n, %)              |              |
| 3–6 months                           | 13 (33)      |
| 7–12                                 | 12 (31)      |
| >12                                  | 14 (36)      |

Back+leg pain measured as the sum of worst, average and actual pain. Disability estimated by the Roland Morris Questionnaire, and tender points estimated by standardised digital palpation.

\* Median tender points of Observer A on day 1: men 5, women 10.5.

**Table 2** Intrarater differences, reliability and agreement

|                   | Day 1<br>mean<br>(SD) | Day 2<br>mean<br>(SD) | Intra-<br>observer<br>difference<br>mean<br>(SD) | Intraclass<br>correlation<br>coefficient<br>(CI) | Agreement (%)                   |                                 | Limits of<br>agreement | SDD* |
|-------------------|-----------------------|-----------------------|--------------------------------------------------|--------------------------------------------------|---------------------------------|---------------------------------|------------------------|------|
|                   |                       |                       |                                                  |                                                  | +/- 1 TP<br>all<br>men<br>women | +/- 3 TP<br>all<br>men<br>women |                        |      |
| <b>Observer A</b> | 7.23<br>(4.61)        | 7.08<br>(4.95)        | -0.15<br>(1.90)                                  | 0.83<br>(0.69–0.98)                              | 62<br>62<br>61                  | 95<br>90<br>100                 | -3.65; 3.95            | 4    |
| <b>Observer B</b> | 7.10<br>(4.73)        | 7.41<br>(5.78)        | 0.31<br>(2.68)                                   | 0.72<br>(0.49–0.95)                              | 49<br>62<br>33                  | 85<br>90<br>78                  | -5.05; 5.66            | 6    |

Reliability estimated by the intraclass correlation coefficient.

\* Smallest detectable difference

SD, standard deviation; CI, 95% confidence interval; TP, tender points.

**Table 3** Interrater differences, reliability and agreement

|              | Observer<br>A<br>mean<br>(SD) | Observer<br>B<br>mean<br>(SD) | Inter-<br>observer<br>difference<br>mean<br>(SD) | Intraclass<br>correlation<br>coefficient<br>(CI) | Agreement (%)                   |                                 | Limits of<br>agreement | SDD |
|--------------|-------------------------------|-------------------------------|--------------------------------------------------|--------------------------------------------------|---------------------------------|---------------------------------|------------------------|-----|
|              |                               |                               |                                                  |                                                  | +/- 1 TP<br>all<br>men<br>women | +/- 3 TP<br>all<br>men<br>women |                        |     |
| <b>Day 1</b> | 7.23<br>(4.61)                | 7.10<br>(4.73)                | -0.13<br>(2.30)                                  | 0.77<br>(0.58–0.97)                              | 59<br>67<br>50                  | 85<br>95<br>72                  | -4.64; 4.72            | 5   |
| <b>Day 2</b> | 7.08<br>(4.95)                | 7.41<br>(5.78)                | 0.33<br>(2.08)                                   | 0.84<br>(0.70–0.99)                              | 56<br>57<br>56                  | 87<br>90<br>83                  | -3.83; 4.50            | 5   |

Reliability estimated by the intraclass correlation coefficient.

\*Smallest detectable difference

SD, standard deviation; CI, 95% confidence interval; TP, tender points.

1  
2  
3  
4 **Reproducibility of tender point examination in chronic low back pain patients as**  
5 **measured by intra- and interrater reliability and agreement: a validation study**  
6  
7

8  
9 Ole K. Jensen<sup>1,3</sup>

10 Jacob Callesen<sup>2</sup>

11 Merete G. Nielsen<sup>1,3</sup>

12 Torkell Ellingsen<sup>2,3</sup>  
13  
14  
15  
16  
17  
18  
19

20 <sup>1,3</sup> Spine Center, Diagnostic Center, Regional Hospital Silkeborg, Denmark.

21 <sup>2</sup> Institute of Public Health, Aarhus University, Denmark

22 <sup>3</sup> Department of Rheumatology, Diagnostic Center, Region Hospital Silkeborg, Denmark  
23  
24  
25  
26  
27  
28  
29  
30  
31  
32  
33  
34  
35  
36  
37  
38  
39  
40  
41  
42  
43  
44  
45

46 Address for correspondence: Ole Kudsk Jensen, Vestre Strandallé 158, 8240 Risskov

47 Tel: 004587227305, fax: 004587222750

48 E-mail: [olejesen@rm.dk](mailto:olejesen@rm.dk)  
49  
50  
51  
52

53 Keywords: Tender points, digital examination, low back pain, reliability, agreement  
54

55 Word count: 2,960  
56  
57  
58  
59  
60

## ABSTRACT

**Objectives:** To evaluate the reliability and agreement of digital tender point (TP) examination in chronic low back pain (LBP) patients.

**Design:** Cross-sectional study.

**Settings:** Hospital-based validation study.

**Participants:** Among sick-listed LBP patients referred from general practitioners for low back examination and return-to-work intervention, 43 and 39 patients (18 females, 46%) entered and completed the study, respectively.

**Main outcome measures:** The reliability was estimated by the intraclass correlation coefficient (ICC), and agreement was calculated for up to  $\pm 3$  TPs. Furthermore, the smallest detectable difference was calculated.

**Results:** TP examination was performed twice by two consultants in rheumatology and rehabilitation at 20 minutes intervals and repeated 1 week later. Intrarater reliability in the more and less experienced rater was ICC 0.84 (95% confidence interval (CI): 0.69–0.98) and 0.72 (CI: 0.49–0.95), respectively. The figures for interrater reliability were intermediate between these figures. In more than 70% of the cases the raters agreed within  $\pm 3$  TPs in both men and women and between test days. The smallest detectable difference between raters was 5, and for the more and less experienced rater it was 4 and 6 TPs, respectively.

**Conclusions:** The reliability of digital TP examination ranged from acceptable to excellent, and agreement was good in both men and women. The smallest detectable differences varied from 4 to 6 TPs. Thus, TP examination in our hands was a reliable, but not a precise instrument. Digital TP examination may be useful in daily clinical practice, but regular use and training sessions are required to secure quality of testing.

## ARTICLE SUMMARY

### Article Focus

- Diffuse hyperalgesia may be evaluated by tender point examination and may reflect deficient descending pain inhibition as in fibromyalgia.
- Tender point examination is increasingly relevant to improve clinical assessment in inflammatory as well as non-inflammatory rheumatologic disorders.
- Reproducibility of this examination technique is not well documented and was therefore investigated.

### Key messages

- In sick-listed chronic low back pain patients digital tender point examination was a reliable, but not a precise instrument.
- In both women and men there was more than 70% agreement within  $\pm 3$  tender points.
- The method was quick and easy to use with no requirement for equipment, except in initial training sessions.

### Strengths and limitations

- The study included a well defined chronic low back pain population that was referred from general practitioners for low back pain examination and return-to-work intervention.
- The number of patients was limited and only two raters were involved resulting in wide confidence intervals and limited generalizability.

## INTRODUCTION

Tender point (TP) examination has been the cornerstone examination in patients with chronic widespread pain (CWP) to distinguish fibromyalgia patients from patients with CWP only. In the general population, the former and the latter condition have been identified in 0.5–4%<sup>1</sup> and 10–13%,<sup>2,3</sup> respectively. Persons fulfilling the fibromyalgia criteria (CWP &  $\geq 11$  TPs) report more pain and more disability than persons with CWP who have less than 11 TPs.<sup>4</sup> TP examination is performed by standardised digital palpation at 18 points symmetrically distributed on the body (Figure 1).<sup>5</sup> In the general population, men and women had a median of 3 and 6 TPs, respectively,<sup>6</sup> and women may have up to 4 TPs more than men.<sup>7</sup>

TP examination may be relevant in conditions other than CWP or regional pain syndromes. In inflammatory rheumatic diseases, TP examination may also contribute to the clinical evaluation. For instance, high disease activity in the absence of inflammatory activity in rheumatoid arthritis is often seen in patients with many TPs.<sup>8</sup> This may lead to inappropriate treatment of disease activity. In systemic lupus erythematosus, health status has been shown to be inferior in patients with many TPs as compared to patients with few TPs.<sup>9</sup>

In sick-listed low back pain (LBP) patients, the intensity of back pain is associated with the number of TPs, and patients with radiculopathy have fewer TPs than patients with non-specific LBP.<sup>10</sup> Furthermore, TPs are associated with the reporting of widespread pain and with long-term prognosis.<sup>11</sup> According to another study,<sup>12</sup> patients with both CWP and non-specific LBP have more pain, higher disability and more TPs than patients with LBP only.

Reliability and agreement studies are, however, few and insufficient. The original study defining fibromyalgia<sup>5</sup> included 293 patients and 265 controls. Since then, we have been able to identify only three small studies comparing the reliability of digital palpation and dolorimetry with TPs defined as in the original study.<sup>13–15</sup> Each study included 15–25 individuals. The reliability was acceptable and comparable for both dolorimetry and digital palpation, and Kappa-values of 0.44–0.92 were reported for the digital examination. However, only the reliability of testing each TP location as positive was estimated, not the reliability of the total TP counts. In other non-specific pain studies, the reliability of TP examination was not formally tested, or digital examination was not used.<sup>16–20</sup>

Since the total TP count – and not each single TP – is used for the clinical evaluation in rheumatologic conditions, more reliability and agreement studies of the total TP count are needed.



1  
2  
3  
4 Accordingly, the purpose of the present study was to investigate the reproducibility of total TP  
5 counts based on digital TP examination in chronic sick-listed LBP patients in terms of 1) intra- and  
6 interrater reliability and 2) intra- and interrater agreement.  
7  
8

## 9 10 **METHODS**

11 The patients were recruited among patients referred from their general practitioners to the Spine  
12 Center for participation in a controlled study.  
13

14 Inclusion criteria: partly or fully sick-listed for more than 4 weeks due to LBP with or without  
15 radiculopathy, LBP should be the prime reason for sick-listing and at least as bothersome as pain  
16 elsewhere, age 16-60 years, referred from a well-defined geographical area of about 280,000  
17 inhabitants, and the patient should be able to speak and understand Danish.  
18

19 Exclusion criteria: living outside the referral area, continuing or progressive radiculopathy resulting  
20 in plans for surgery, low back surgery within the last year, previous lumbar fusion operation,  
21 suspected cauda equina syndrome, progressive paresis or other serious back disease, (e.g. tumour),  
22 pregnancy, known dependency on drugs or alcohol, or primary psychiatric disease.  
23

24 Except for the duration of sick-listing, which was longer than 4 weeks in some of the patients, all  
25 participants fulfilled the above criteria.  
26

27 The patients were contacted between 1<sup>st</sup> November 2009 and 1<sup>st</sup> March 2010 and were only  
28 included in the present study after more than 3 weeks had passed since their first consultation at the  
29 Spine Center. They were offered participation in the study by one of the authors (JC) who was the  
30 leader of the project but was not a staff member, and they were told that the investigation had  
31 nothing to do with the management of their LBP. The patients were informed that the examination  
32 would only include measuring of diffuse tenderness by TP examination and spinal range of motion  
33 (not reported in this paper). Previously, all patients had been subjected to a clinical low back  
34 examination and TP examination at their first consultation at the Spine Center.  
35

36 The examinations were performed by two clinicians (OKJ & MGN), both consultants in  
37 rheumatology and rehabilitation. Beforehand, the TP examination method was taught by the more  
38 experienced rater (OKJ = Rater A) to the less experienced rater (MGN = Rater B) during a 2-hour  
39 session. Each test day, before starting examinations, the two raters calibrated their thumbs with a  
40 dolorimeter,<sup>21</sup> which was able to register four pressures at a time and calculate means and standard  
41 deviations.  
42  
43  
44  
45  
46  
47  
48  
49  
50  
51  
52  
53  
54  
55  
56  
57  
58  
59  
60

1  
2  
3  
4 The examinations were performed during 2 test days, day 1 and day 2, at 1 week intervals. To  
5 include all patients, the test days were repeated twice. The patients were randomised so that half of  
6 the patients were first tested by Rater A, the other half first by Rater B, but keeping the same  
7 sequence on day 2 as on day 1. Twenty minutes passed between the examinations.  
8

9  
10 Before examination, the patients filled out a questionnaire including questions regarding back+leg  
11 pain<sup>22</sup> and disability,<sup>23</sup> increasing scores representing increasing pain and disability. At the clinical  
12 examination, the patient's range of spinal motion was first measured in the standing position.  
13  
14 Subsequently, the patient was asked to lie prone, and a 4-kg digital pressure was demonstrated on  
15 the distal, dorsal aspect of the forearm. The patient was instructed in the following way: "This is a  
16 firm pressure. Afterwards, this pressure will be applied on different spots on the body. At every  
17 spot, I would like you to report if the pressure is painful or is felt like firm pressure." The TPs  
18 (figure 1) were tested in a standardised manner from right to left, first testing the medial fat pads of  
19 the knees and the posterior aspects of the greater trochanter. Afterwards, with the patient seated, the  
20 spots were tested from top and downwards as follows: the suboccipital muscle insertions, the  
21 anterior-lateral aspect of the intertransverse aspects of C5-7, the midpoints of the upper borders of  
22 trapezius, the medial parts of the supraspinatus, the costo-chondral junctions of costa 2, the forearm  
23 2 cm distal to the epicondyles, and the outer upper quadrants of the buttocks. The patients were  
24 instructed not to tell the result of the TP examination to the raters or others.  
25  
26

27  
28  
29  
30  
31  
32  
33  
34  
35  
36  
37  
38  
39  
40  
41  
42  
43  
44  
45  
46  
47  
48  
49  
50  
51  
52  
53  
54  
55  
56  
57  
58  
59  
60

Positive TPs (e.g. pressures causing pain) were memorised by the raters and summed up to the total number of TPs (the TP count). The procedure lasted 6-8 minutes per examination. A secretary was associated with each rater. The TP counts were reported to this secretary, who passed the data to the project leader (JC). In this way the raters were blinded in relation to each other.

The secretary also registered pain response at every single tender point location.

### Statistical analyses

The requirement for testing intra- and interrater reliability was planned to include a sample size of at least 40 persons.<sup>24</sup> The TP counts were distributed as discrete numerical variables and were normally distributed. For the quantification of intra- and interrater reproducibility of tender point examination, two types of analysis were applied: the intraclass correlation coefficient (ICC) and the Bland-Altman method for assessing agreement.<sup>25 26</sup> ICC provides information on the ability to differentiate between the variation between subjects and measurement variation. The ICC was defined as the ratio of variance among patients (subject variability) over the total variance (subject

variability, observer variability and measurement variability). ICC ranges between 0 (no reliability) and 1 (perfect reliability), and values of ICCs are excellent when  $> 0.75$  and poor when  $< 0.40$ . Results between these ranges represent moderate to good reliability.<sup>27</sup> According to another reference, ICC  $> 0.7$  is considered good.<sup>25</sup>

The Bland-Altman method provides insight into the distribution of differences in relation to mean values.<sup>28</sup> Agreement was quantified by calculating the mean difference between two sets of observations and the standard deviation (SD) for this difference. The closer the mean difference was to 0 and the smaller the SD of this difference, the better the agreement. The differences were depicted in relation to the mean values. The 95% limits of agreement were defined as the mean difference between the raters  $\pm 1.96 \times \text{SD}_{\text{of the difference}}$ . Furthermore, agreement within  $\pm 1$  TPs and  $\pm 3$  TPs was calculated.

To determine whether a real change in outcome has occurred in clinical practice and research, a change must be at least the smallest detectable difference (SDD) of a measurement procedure.<sup>25</sup> The SDD was calculated as  $1.96 \times \sqrt{(2 \times \text{SEM}^2)}$ , where the standard error of measurement (SEM) was defined as  $\text{SD}_{\text{of the difference}}/\sqrt{2}$ . SDD was calculated and rounded up to the nearest whole number.

Cronbach's alpha is a measure of internal consistency, i.e. that different items of a test battery are intercorrelated and measure the same construct. Values  $> 0.9$  are considered excellent.

The reliability of each tender point location was measured by Kappa statistics.

## RESULTS

Eighty-three patients were invited to join the study, and 39 patients completed both test days (figure 2). Four patients dropped out from day 1 to day 2, three without explanation, the fourth was excluded because of hospital admission and change of pain medication between the two test days.

Pain medication was unchanged in the other patients.

Baseline characteristics are displayed in table 1.

### *Intrarater reliability and agreement*

The mean TP count was 7 and differed little between test days (table 2). The intraclass correlation coefficient (ICC) in Rater A was excellent, 0.83 (95% confidence interval (CI) 0.69-0.98), reflecting a high degree of reliability. ICC was somewhat lower, but still good in Rater B, 0.72 (CI 0.49-0.95). The relations between TP counts on days 1 and 2 are graphically displayed in figure 3

1  
2  
3  
4 (left panel). The circles representing more than one observation were all located near the equality  
5 lines, and the observations were distributed over the whole range of TP counts.

6  
7 In about half of the observations, agreement was within  $\pm 1$  TP. For both raters more than 75% of  
8 the TP counts were within  $\pm 3$  TPs in both sexes. The limits of agreement were within  $\pm 4$  and  $\pm$   
9 6 TPs for Rater A and B, respectively (figure 3 right panel), corresponding to the smallest  
10 detectable differences (SDD) (table 2). Measurement errors (SEM) were 1.34 ( $=1.90/\sqrt{2}$ ) and 1.89  
11 ( $=2.68/\sqrt{2}$ ) for Rater A and Rater B, respectively. Cronbach's alpha was 0.96 and 0.92 for Rater A  
12 and B, respectively.

### 13 14 15 16 17 18 19 *Interrater reliability and agreement*

20 The mean differences of TP counts differed little between the two raters (Table 3). The relations  
21 between TP counts of Rater A and Rater B are shown in figure 4, left panel, and limits of agreement  
22 in the right panel. The circles representing more than one observation were all located near the  
23 equality and zero lines. On both test days ICC was higher than 0.75. In more than 70% of the cases,  
24 Rater B agreed with Rater A regarding  $\pm 3$  TPs in both men and women. The limits of agreement  
25 were within  $\pm 5$  TPs corresponding to SDD of 5 TPs. Measurement errors (SEM) were 1.63  
26 ( $=2.30/\sqrt{2}$ ) and 1.47 ( $=2.08/\sqrt{2}$ ) on day 1 and day 2, respectively. Cronbach's alpha was 0.94 and  
27 0.96 on day 1 and 2, respectively.

### 28 29 30 31 32 33 34 35 36 *Reliability of testing each tender point location*

37 In Appendix is shown the reliability of testing each tender point location. Agreement varied from  
38 69% to 90%, and Kappa values varied from 0.13 to 0.89.

## 39 40 41 42 **DISCUSSION**

43 The present study showed that digital TP examination resulted in total TP counts with acceptable to  
44 excellent reliability when calibration of the thumbs with a dolorimeter was performed before the  
45 testing. This indicated that the measurement error, which was less than 2 TPs, was considerably  
46 smaller than the variation between individuals. The lesser experienced Rater B did not perform as  
47 well as the more experienced Rater A, and this was especially evident on comparison of the lower  
48 limits of the confidence intervals. However, the reliability of Rater B was acceptable, but more  
49 training and regular use would probably improve the results. Training has been shown to reduce the  
50 variability in applying a 4-kg digital force.<sup>29</sup>

1  
2  
3  
4 Agreement is independent of the variation between subjects. We consider an agreement of more  
5 than 70% as good, and it was found for +/-3 TPs in both men and women, indicating that digital TP  
6 examination in daily practice may be used, keeping in mind the uncertainty of +/-3 TPs. This part of  
7 the result was especially important, since we found that TP counts were higher in women than in  
8 men, in line with other studies. In the general population, TP counts of more than 10 and 6 have  
9 been identified in 10-20% of women and men, respectively.<sup>6,7</sup> Thus, a TP count of 9 may be normal  
10 in women, but high in men.

11  
12 The median TP count of 8 was elevated as compared to the median TP count in the general  
13 population which is between 3 and 6 TPs.<sup>6</sup> Previously, it has been shown that TP counts were  
14 elevated in regional pain conditions as compared to pain-free controls, but lower than in  
15 fibromyalgia.<sup>30</sup>

16  
17 However, SDD ranged from 4 to 6, indicating less precision of TP examination than reliability.  
18 Thus, according to the present study, TP examination may result in TP counts that may differentiate  
19 between high, intermediate or low levels, but not between different levels in the low or high range.  
20 Moreover, TP examination – as used in the present study – would not be sufficiently precise to  
21 differentiate patients with higher or lower TP counts than 10/11 TPs such as are used in the  
22 diagnosis of fibromyalgia.

23  
24 Accordingly, a SDD of 4-6 was not impressive, but not so different from other measures in LBP.  
25 The minimal detectable change, which is defined closely to SDD,<sup>25,31</sup> has been shown to be 4-5  
26 points in the Roland Morris Questionnaire,<sup>32</sup> a commonly used instrument in LBP.

27  
28 In fibromyalgia, the peripheral sensory thresholds are normal, but pain processing is augmented,  
29 primarily due to dysfunction of the descending pain inhibition system in the brainstem.<sup>33</sup> In the  
30 present study, the patients were sick-listed because of chronic LBP, and we have previously  
31 presented data making it plausible that LBP can partly be explained by mechanisms similar to  
32 those seen in fibromyalgia patients.<sup>10</sup>

33  
34 We found high internal consistency, as all Cronbach's alpha values were above 0.90. This may  
35 support the assumption that TP counts measure the same construct, e.g. insufficient pain inhibition,  
36 rather than local abnormality. Therefore, in chronic LBP patients, TPs may be interpreted as  
37 follows: A high TP count may indicate an insufficiently functioning descending pain inhibition  
38 system, whereas a low TP count may indicate a well-functioning system. TP counts in the middle of  
39 the distribution are inconclusive. The present study does not provide sufficient data to set limits for  
40 high or low TP counts in LBP patients.  
41  
42  
43  
44  
45  
46  
47  
48  
49  
50  
51  
52  
53  
54  
55  
56  
57  
58  
59  
60

1  
2  
3  
4 In the present chronic LBP population, there was no significant change in TP counts during 1 week.  
5 We could have chosen a shorter or longer interval, but 1 week was chosen for pragmatic reasons,  
6 because we assumed that 1 week would not be too long in a patient population with long-lasting  
7 pain. One might expect more change in TP counts during 1 week in patients with acute LBP. A  
8 systematic difference in TP count between the first and second TP examination might have  
9 occurred, but such a potential difference was not apparent because the raters were randomised to be  
10 either the first or second rater.  
11  
12  
13  
14  
15

16  
17 The value of TP examination has been questioned. Firstly, the examination method may be  
18 unreliable, because the pain response may be affected by expectations<sup>1</sup> or distress.<sup>34</sup> When the  
19 examination is performed randomly with the patient blinded for the pressure gradient, the results are  
20 different as compared to non-blinded testing.<sup>34 35</sup> Secondly, it may be inadequate to use a sharp cut-  
21 point ( $\geq 11$  TPs) to distinguish health from disease in pain conditions.<sup>36</sup> At present, fibromyalgia is  
22 considered part of a larger continuum.<sup>37 38</sup> Thirdly, there have been problems with implementation  
23 of the examination technique, especially in primary care. Often, it has been incorrectly performed,  
24 and some physicians have refused to use the method.<sup>39</sup>  
25  
26  
27  
28  
29

30 Therefore, new criteria for diagnosing fibromyalgia have been developed and validated. These  
31 criteria do not include TP examination, and therefore they will enable clinicians and researchers to  
32 diagnose fibromyalgia by surveys. However, the new criteria were not meant to replace the original  
33 ACR criteria, but to represent an alternative method of diagnosis,<sup>39</sup> and the new criteria have not  
34 been tested in rheumatic conditions and may not be relevant in patients with inflammatory  
35 rheumatic diseases. In these conditions, fibromyalgia symptoms may be caused by the rheumatic  
36 disease and not by dysfunction of the descending pain inhibition system. Therefore, TP examination  
37 will still be relevant both at present and in the future.  
38  
39  
40  
41  
42  
43

44 The reliability of testing each tender point location was not different from previous reporting in the  
45 literature.<sup>13-15</sup>  
46  
47

#### 48 *Strengths*

49 The present study was conducted in a well-defined population recruited by general practitioners on  
50 the basis of sick-listing due to LBP, and all had chronic LBP. TPs were normally distributed,  
51 making it possible to analyze data with parametric methods.  
52  
53  
54  
55  
56  
57  
58  
59  
60

### *Weaknesses*

The number of patients was small, resulting in wide confidence intervals of ICC, and only two raters participated. If more raters had participated, the results would be more generalisable.

### *Perspectives*

The possible advantages of using TP examination in LBP patients include ease and speed, no requirement for equipment, and good reliability and agreement. Furthermore, malingering or appealing distress will probably not induce bias in LBP patients, who do not know what to prefer, many or few tender points.

The possible disadvantages include lack of precision and the need for training and equipment (dolorimeter).

We need to know more about the variability of the TP count over time, and we need reproducibility studies comparing TP counts with other measures of dysfunction of the descending pain inhibiting system.<sup>37</sup> As an example, lack of cold tolerance has been documented in whiplash patients with prolonged symptoms.<sup>40</sup> TP counts may be compared with cold tolerance.

Furthermore, it would be interesting to see reliability and agreement studies of the total TP count in fibromyalgia patients and patients with inflammatory rheumatic diseases. Findings resembling the results of the present study may have implications for the fibromyalgia criteria.

### *Conclusion*

Digital TP examination in sick-listed chronic LBP patients was a reliable, but not a precise instrument. More reliability and agreement studies are needed in LBP patients and other populations, including patients with inflammatory rheumatic diseases.

### **Acknowledgements**

The authors thank Senior Biostatistician Robin Christensen, MSc, PhD, Head of Musculoskeletal Statistics Unit, The Parker Institute, Copenhagen University Hospital, Denmark, for invaluable help with the statistical analyses.

### **Funding**

The study was supported by The Research Fund of Regional Hospital Silkeborg, Denmark.

### **Competing interests**

None

### **Ethics approval**

All patients signed informed consent. The study was reported to the Regional Ethics Committee, who answered that approval was not necessary because only methodology was studied. The study was reported to the Danish Data Protection Agency (No. 2007-58-0010).

### **Author contributions**

Jacob Callesen (JC), Ole K. Jensen (OKJ) and Torkell Ellingsen (TE) planned the study. JC designed the study in detail and was responsible for acquisition of data and obtaining funding. Merete G. Nielsen (MGN) and OKJ performed the clinical examinations. JC and OKJ were responsible for analysing and interpreting the data. OKJ wrote the manuscript, which was again revised by JC, TE and MGN. OKJ was responsible for administrative and technical support. All authors discussed the results and commented on the manuscript.



## REFERENCES

1. Clauw DJ, Crofford LJ. Chronic widespread pain and fibromyalgia: what we know, and what we need to know. *Best.Pract.Res.Clin.Rheumatol* 2003;17:685-701.
2. Macfarlane GJ, Pye SR, Finn JD, *et al.* Investigating the determinants of international differences in the prevalence of chronic widespread pain: evidence from the European Male Ageing Study. *Ann.Rheum.Dis* 2009;68:690-5.
3. Bergman S, Herrstrom P, Hogstrom K, *et al.* Chronic musculoskeletal pain, prevalence rates, and sociodemographic associations in a Swedish population study. *J.Rheumatol.* 2001;28:1369-77.
4. Coster L, Kendall S, Gerdle B, *et al.* Chronic widespread musculoskeletal pain - a comparison of those who meet criteria for fibromyalgia and those who do not. *Eur.J Pain* 2008;12:600-10.
5. Wolfe F, Smythe HA, Yunus MB, *et al.* The American College of Rheumatology 1990 Criteria for the Classification of Fibromyalgia. Report of the Multicenter Criteria Committee. *Arthritis Rheum.* 1990;33:160-72.
6. Croft P, Schollum J, Silman A. Population study of tender point counts and pain as evidence of fibromyalgia. *BMJ* 1994;309:696-9.
7. Wolfe F, Ross K, Anderson J, *et al.* Aspects of fibromyalgia in the general population: sex, pain threshold, and fibromyalgia symptoms. *J Rheumatol* 1995;22:151-6.
8. Ton E, Bakker MF, Verstappen SM, *et al.* Look beyond the disease activity score of 28 joints (DAS28): tender points influence the DAS28 in patients with rheumatoid arthritis. *J Rheumatol.* 2012;39:22-7.
9. Akkasilpa S, Goldman D, Magder LS, *et al.* Number of fibromyalgia tender points is associated with health status in patients with systemic lupus erythematosus. *J Rheumatol.* 2005;32:48-50.
10. Jensen OK, Nielsen CV, Stengaard-Pedersen K. Low back pain may be caused by disturbed pain regulation: a cross-sectional study in low back pain patients using tender point examination. *Eur.J Pain* 2010;14:514-22.
11. Jensen OK, Nielsen CV, Stengaard-Pedersen K. One-year prognosis in sick-listed low back pain patients with and without radiculopathy. Prognostic factors influencing pain and disability. *Spine J* 2010;10:659-75.
12. Nordeman L, Gunnarsson R, Mannerkorpi K. Prevalence and characteristics of widespread pain in female primary health care patients with chronic low back pain. *Clin J Pain.* 2012;28:65-72.
13. Cott A, Parkinson W, Bell MJ, *et al.* Interrater reliability of the tender point criterion for fibromyalgia. *J Rheumatol.* 1992;19:1955-9.
14. Tunks E, McCain GA, Hart LE, *et al.* The reliability of examination for tenderness in patients with myofascial pain, chronic fibromyalgia and controls. *J Rheumatol.* 1995;22:944-52.
15. Rasmussen JO, Smidth M, Hansen TM. [Examination of tender points in soft tissue. Palpation versus pressure-algometer]. *Ugeskr.Laeger* 1990;152:1522-6.

16. Maquet D, Croisier JL, Demoulin C, *et al.* Pressure pain thresholds of tender point sites in patients with fibromyalgia and in healthy controls. *Eur.J Pain* 2004;8:111-7.
17. McVeigh JG, Finch MB, Hurley DA, *et al.* Tender point count and total myalgic score in fibromyalgia: changes over a 28-day period. *Rheumatol.Int* 2007;27:1011-8.
18. Tastekin N, Uzunca K, Sut N, *et al.* Discriminative value of tender points in fibromyalgia syndrome. *Pain Med* 2010;11:466-71.
19. Tastekin N, Birtane M, Uzunca K. Which of the three different tender points assessment methods is more useful for predicting the severity of fibromyalgia syndrome? *Rheumatol.Int* 2007;27:447-51.
20. Harden RN, Revivo G, Song S, *et al.* A critical analysis of the tender points in fibromyalgia. *Pain Med* 2007;8:147-56.
21. Commander Algometry. 2004. JTECH Medical, 470 Lawndale Drive, Salt Lake City, 84115 Utah,
22. Manniche C, Asmussen K, Lauritsen B, *et al.* Low Back Pain Rating scale: validation of a tool for assessment of low back pain. *Pain* 1994;57:317-26.
23. Albert HB, Jensen AM, Dahl D, Rasmussen MN. [Criteria validation of the Roland Morris questionnaire. A Danish translation of the international scale for the assessment of functional level in patients with low back pain and sciatica]. *Ugeskr.Laeger* 2003;165:1875-80.
24. Hopkins WG. Measures of reliability in sports medicine and science. *Sports Med* 2000;30:1-15.
25. de Vet HC, Terwee CB, Knol DL, *et al.* When to use agreement versus reliability measures. *J Clin Epidemiol.* 2006;59:1033-9.
26. Kottner J, Audige L, Brorson S, *et al.* Guidelines for Reporting Reliability and Agreement Studies (GRRAS) were proposed. *Int J Nurs.Stud.* 2011;48:661-71.
27. Andresen EM. Criteria for assessing the tools of disability outcomes research. *Arch Phys Med Rehabil.* 2000;81:S15-S20.
28. Bland JM, Altman DG. Statistical methods for assessing agreement between two methods of clinical measurement. *Lancet* 1986;1:307-10.
29. Smythe H. Examination for tenderness: learning to use 4 kg force. *J Rheumatol.* 1998;25:149-51.
30. Granges G, Littlejohn G. Pressure pain threshold in pain-free subjects, in patients with chronic regional pain syndromes, and in patients with fibromyalgia syndrome. *Arthritis Rheum.* 1993;36:642-6.
31. Stauffer ME, Taylor SD, Watson DJ, *et al.* Definition of nonresponse to analgesic treatment of arthritic pain: an analytical literature review of the smallest detectable difference, the minimal detectable change, and the minimal clinically important difference on the pain visual analog scale. *Int J Inflamm.* 2011; 2011: Article ID 231926, 6 pages. doi:10.4061/2011/231926.
32. Stratford PW, Binkley J, Solomon P, *et al.* Defining the minimum level of detectable change for the Roland-Morris questionnaire. *Phys Ther.* 1996;76:359-65.

- 1  
2  
3  
4 33. Nielsen LA, Henriksson KG. Pathophysiological mechanisms in chronic musculoskeletal pain  
5 (fibromyalgia): the role of central and peripheral sensitization and pain disinhibition.  
6 *Best.Pract.Res.Clin.Rheumatol* 2007;21:465-80.  
7  
8 34. Petzke F, Gracely RH, Park KM, *et al.* What do tender points measure? Influence of distress on 4  
9 measures of tenderness. *J Rheumatol.* 2003;30:567-74.  
10  
11 35. Harris RE, Gracely RH, McLean SA, *et al.* Comparison of clinical and evoked pain measures in  
12 fibromyalgia. *J Pain* 2006;7:521-7.  
13  
14 36. Wolfe F. The relation between tender points and fibromyalgia symptom variables: evidence that  
15 fibromyalgia is not a discrete disorder in the clinic. *Ann.Rheum.Dis* 1997;56:268-71.  
16  
17 37. Arendt-Nielsen L, Graven-Nielsen T. Central sensitization in fibromyalgia and other musculoskeletal  
18 disorders. *Curr.Pain Headache Rep.* 2003;7:355-61.  
19  
20 38. Perrot S, Dickenson AH, Bennett RM. Fibromyalgia: harmonizing science with clinical practice  
21 considerations. *Pain Pract* 2008;8:177-89.  
22  
23 39. Wolfe F, Clauw DJ, Fitzcharles MA, *et al.* The American College of Rheumatology preliminary  
24 diagnostic criteria for fibromyalgia and measurement of symptom severity. *Arthritis Care Res*  
25 *(Hoboken.)* 2010;62:600-10.  
26  
27 40. Kasch H, Qerama E, Bach FW, Jensen TS. Reduced cold pressor pain tolerance in non-recovered  
28 whiplash patients: a 1-year prospective study. *Eur J Pain.* 2005;9:561-9.  
29  
30  
31  
32  
33  
34  
35  
36  
37  
38  
39  
40  
41  
42  
43  
44  
45  
46  
47  
48  
49  
50  
51  
52  
53  
54  
55  
56  
57  
58  
59  
60

## LEGENDS FOR FIGURES

**Figure 1** Locations of tender points according to American College of Rheumatology<sup>5</sup>.

**Figure 2** Flow-chart.

**Figure 3** Intrarater reliability and agreement. Reliability with lines of equality shown in left panel. Agreement shown by Bland-Altman plots in right panel displaying differences of tender point (TP) counts on y-axes and average of TP counts on x-axes. The upper and the lower horizontal line represent 95% limits of agreement. Areas of the circles are proportional to the number of observations.

**Figure 4** Interrater reliability and agreement. Reliability with lines of equality shown in left panel. Agreement shown by Bland-Altman plots in right panel displaying differences of tender point (TP) counts on y-axes and the average of TP counts on x-axes. The upper and the lower horizontal line represent 95% limits of agreement. Areas of the circles are proportional to the number of observations.

**Table 1** Baseline characteristics

| <b>Variables</b>                     |              |
|--------------------------------------|--------------|
| Sex (men/women)                      | 21/18        |
| Age (mean, range)                    | 42.0 (24–58) |
| Back+leg pain (0–60, median, range ) | 22 (2–50)    |
| Disability (0–23, median, range)     | 14 (0–23)    |
| Tender points* (0–18, median, range) | 8 (0–18)     |
| Duration of pain (n, %)              |              |
| 3–6 months                           | 13 (33)      |
| 7–12                                 | 12 (31)      |
| >12                                  | 14 (36)      |

Back+leg pain measured as the sum of worst, average and actual pain.  
Disability estimated by the Roland Morris Questionnaire, and tender points estimated by standardised digital palpation.

\* Median tender points of Observer A on day 1: men 5, women 10.5.

**Table 2** Intrarater differences, reliability and agreement

|                   | Day 1<br>mean<br>(SD) | Day 2<br>mean<br>(SD) | Intra-<br>observer<br>difference<br>mean<br>(SD) | Intraclass<br>correlation<br>coefficient<br>(CI) | Agreement (%)                   |                                 | Limits of<br>agreement | SDD* |
|-------------------|-----------------------|-----------------------|--------------------------------------------------|--------------------------------------------------|---------------------------------|---------------------------------|------------------------|------|
|                   |                       |                       |                                                  |                                                  | +/- 1 TP<br>all<br>men<br>women | +/- 3 TP<br>all<br>men<br>women |                        |      |
| <b>Observer A</b> | 7.23<br>(4.61)        | 7.08<br>(4.95)        | -0.15<br>(1.90)                                  | 0.83<br>(0.69–0.98)                              | 62<br>62<br>61                  | 95<br>90<br>100                 | -3.65; 3.95            | 4    |
| <b>Observer B</b> | 7.10<br>(4.73)        | 7.41<br>(5.78)        | 0.31<br>(2.68)                                   | 0.72<br>(0.49–0.95)                              | 49<br>62<br>33                  | 85<br>90<br>78                  | -5.05; 5.66            | 6    |

Reliability estimated by the intraclass correlation coefficient.

\* Smallest detectable difference

SD, standard deviation; CI, 95% confidence interval; TP, tender points.

**Table 3** Interrater differences, reliability and agreement

|              | Observer<br>A<br>mean<br>(SD) | Observer<br>B<br>mean<br>(SD) | Inter-<br>observer<br>difference<br>mean<br>(SD) | Intraclass<br>correlation<br>coefficient<br>(CI) | Agreement (%)                   |                                 | Limits of<br>agreement | SDD |
|--------------|-------------------------------|-------------------------------|--------------------------------------------------|--------------------------------------------------|---------------------------------|---------------------------------|------------------------|-----|
|              |                               |                               |                                                  |                                                  | +/- 1 TP<br>all<br>men<br>women | +/- 3 TP<br>all<br>men<br>women |                        |     |
| <b>Day 1</b> | 7.23<br>(4.61)                | 7.10<br>(4.73)                | -0.13<br>(2.30)                                  | 0.77<br>(0.58–0.97)                              | 59<br>67<br>50                  | 85<br>95<br>72                  | -4.64; 4.72            | 5   |
| <b>Day 2</b> | 7.08<br>(4.95)                | 7.41<br>(5.78)                | 0.33<br>(2.08)                                   | 0.84<br>(0.70–0.99)                              | 56<br>57<br>56                  | 87<br>90<br>83                  | -3.83; 4.50            | 5   |

Reliability estimated by the intraclass correlation coefficient.

\*Smallest detectable difference

SD, standard deviation; CI, 95% confidence interval; TP, tender points.

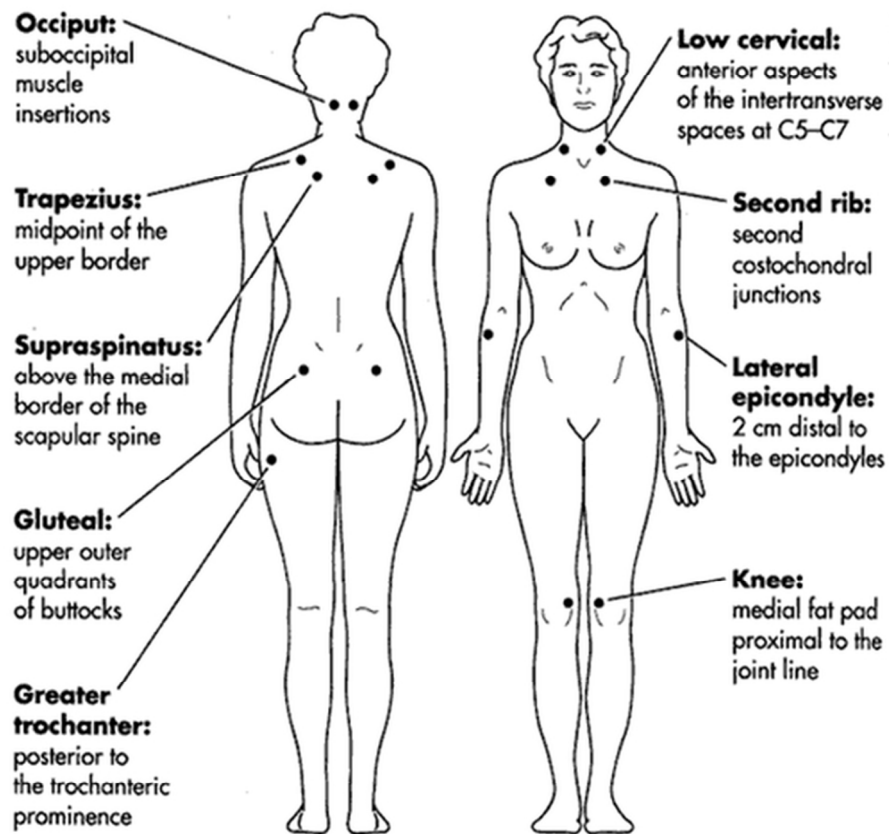

**Figure 1.**

Locations of tender points according to American College of Rheumatology.  
90x90mm (300 x 300 DPI)



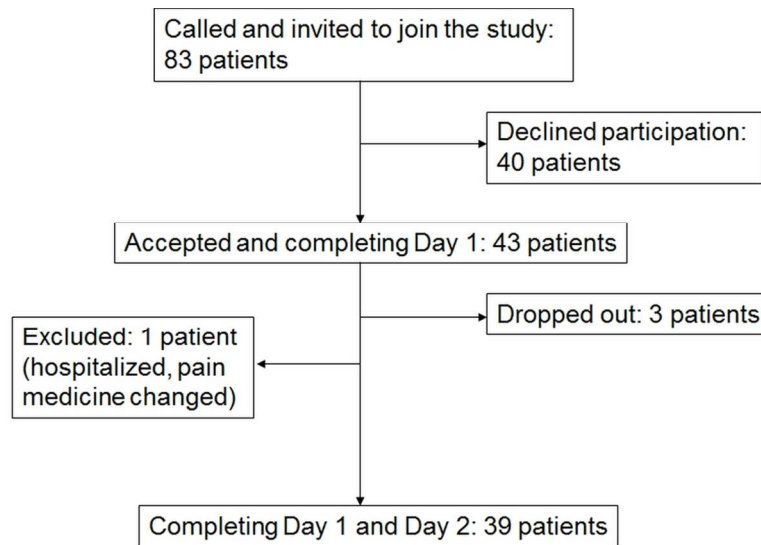

**Figure 2**

Flow-chart.  
119x90mm (300 x 300 DPI)

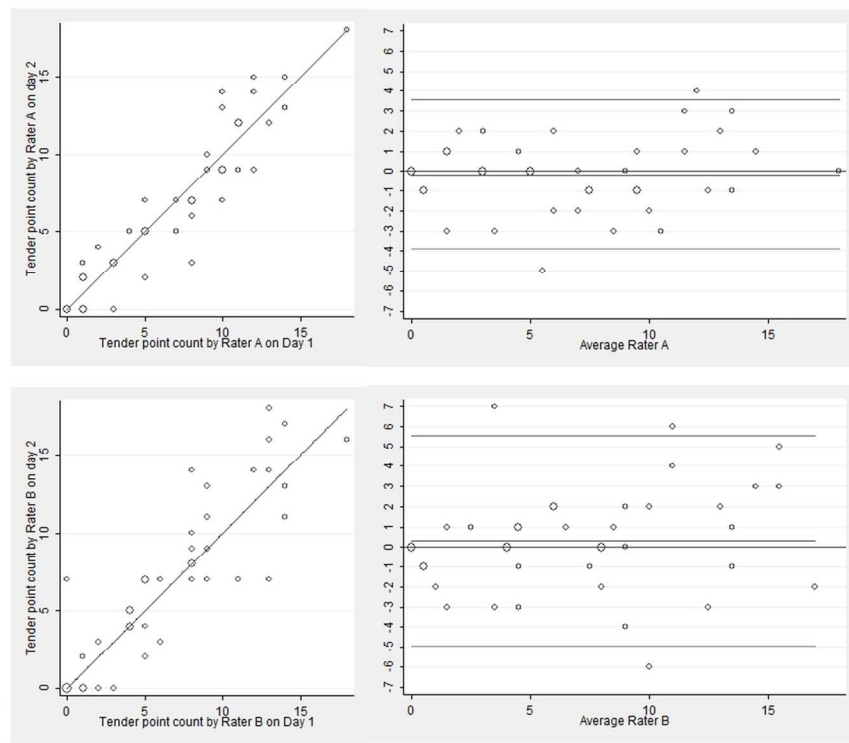

**Figure 3**

Intrarater reliability and agreement. Reliability with lines of equality shown in left panel. Agreement shown by Bland-Altman plots in right panel displaying differences of tender point (TP) counts on y-axes and average of TP counts on x-axes. The upper and the lower horizontal line represent 95% limits of agreement. Areas of the circles are proportional to the number of observations.

119x90mm (300 x 300 DPI)

1  
2  
3  
4  
5  
6  
7  
8  
9  
10  
11  
12  
13  
14  
15  
16  
17  
18  
19  
20  
21  
22  
23  
24  
25  
26  
27  
28  
29  
30  
31  
32  
33  
34  
35  
36  
37  
38  
39  
40  
41  
42  
43  
44  
45  
46  
47  
48  
49  
50  
51  
52  
53  
54  
55  
56  
57  
58  
59  
60

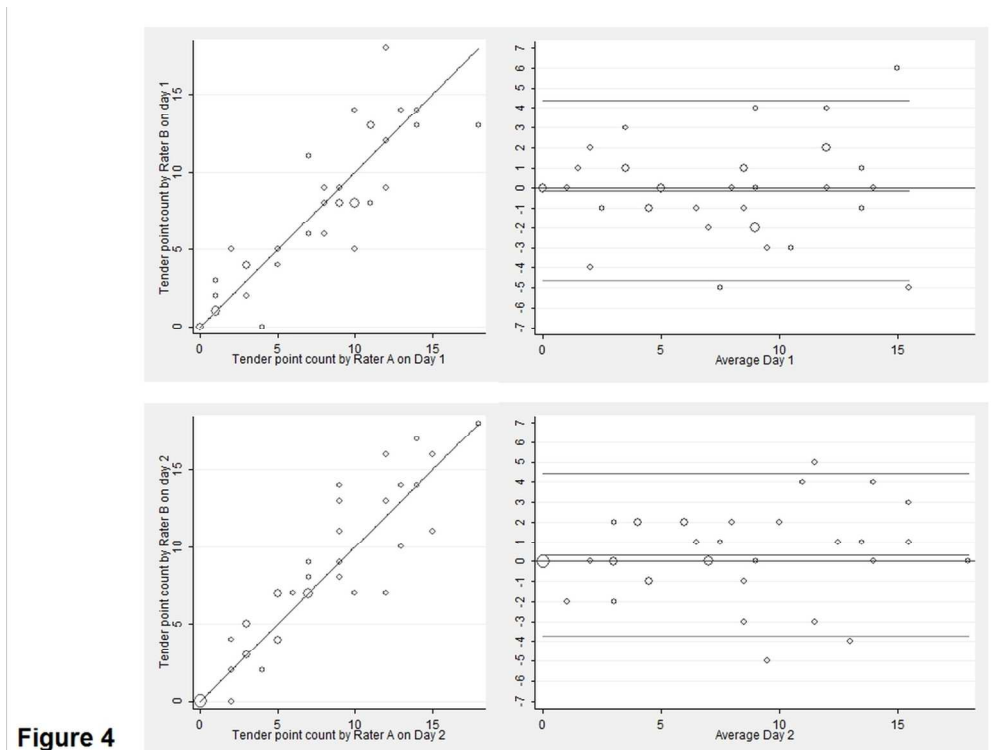

Interrater reliability and agreement. Reliability with lines of equality shown in left panel. Agreement shown by Bland-Altman plots in right panel displaying differences of tender point (TP) counts on y-axes and the average of TP counts on x-axes. The upper and the lower horizontal line represent 95% limits of agreement. Areas of the circles are proportional to the number of observations.  
119x90mm (300 x 300 DPI)

For peer review only

| Tender point location | Intrarater agreement |           | Interrater agreement |           |           |
|-----------------------|----------------------|-----------|----------------------|-----------|-----------|
|                       | Kappa (%-agreement)  |           | Kappa (%-agreement)  |           |           |
|                       | Rater A              | Rater B   | Day 1                | Day 2     |           |
| Suboccipital          | R                    | 0.44 (72) | 0.59 (79)            | 0.64 (82) | 0.59 (79) |
|                       | L                    | 0.58 (80) | 0.42 (72)            | 0.51 (77) | 0.58 (79) |
| C5-7 intertransverse  | R                    | 0.53 (77) | 0.45 (72)            | 0.45 (72) | 0.53 (77) |
|                       | L                    | 0.43 (72) | 0.58 (79)            | 0.43 (72) | 0.38 (69) |
| Trapezius             | R                    | 0.49 (74) | 0.49 (77)            | 0.40 (69) | 0.52 (77) |
|                       | L                    | 0.48 (74) | 0.29 (67)            | 0.48 (74) | 0.60 (82) |
| Supraspinatus         | R                    | 0.52 (79) | 0.62 (82)            | 0.59 (82) | 0.45 (74) |
|                       | L                    | 0.13 (69) | 0.42 (79)            | 0.32 (77) | 0.37 (77) |
| Costo-chondral        | R                    | 0.59 (82) | 0.57 (79)            | 0.62 (82) | 0.54 (79) |
|                       | L                    | 0.65 (85) | 0.60 (82)            | 0.54 (79) | 0.60 (82) |
| Lateral epicondyles   | R                    | 0.41 (74) | 0.64 (85)            | 0.54 (82) | 0.72 (87) |
|                       | L                    | 0.51 (77) | 0.83 (95)            | 0.40 (74) | 0.31 (72) |
| Buttocks              | R                    | 0.78 (90) | 0.79 (90)            | 0.68 (85) | 0.51 (90) |
|                       | L                    | 0.69 (85) | 0.59 (79)            | 0.53 (77) | 0.50 (82) |
| Greater trochanter    | R                    | 0.79 (90) | 0.57 (79)            | 0.48 (74) | 0.78 (90) |
|                       | L                    | 0.54 (77) | 0.46 (77)            | 0.49 (74) | 0.38 (69) |
| Knees                 | R                    | 0.77 (90) | 0.89 (95)            | 0.78 (90) | 0.66 (85) |
|                       | L                    | 0.58 (80) | 0.53 (77)            | 0.69 (85) | 0.62 (82) |

**Appendix.** Pair-wise intra- and interrater reliabilities by location of tender points as defined by American College of Rheumatology (Wolfe et al. 1990).
